# Supplementary material for: A Pt(0) complex with cyclic (alkyl)(amino)silylene and 1,3-divinyl-1,1,3,3-tetramethyldisiloxane ligands: synthesis, molecular structure, and catalytic hydrosilylation activity
Source: Royal Society of Chemistry journal article supplement (doi:10.1039/c7dt01113j), 2017-01-01
Supplement: c7dt01113j1.pdf [file c7dt01113j1.pdf]

## Electronic Supplementary Materials

### A Pt(0) complex with cyclic (alkyl)(amino)silylene and 1,3-divinyl-1,1,3,3-tetramethyl-disiloxane ligands: synthesis, molecular structure and catalytic hydrosilylation activity

Tomohiro Iimura,<sup>†,‡</sup> Naohiko Akasaka,<sup>‡</sup> Tomoyuki Kosai<sup>‡</sup> and Takeaki Iwamoto<sup>‡,\*</sup>

<sup>†</sup>Science & Technology, Dow Corning Toray Co., Ltd. 2-2, Chigusa-Kaigan, Ichihara 299-0108, Japan

<sup>‡</sup>Department of Chemistry, Graduate School of Science, Tohoku University, Aoba-ku, Sendai 980-8578, Japan

#### Contents

|                                                                                              |    |
|----------------------------------------------------------------------------------------------|----|
| 1. NMR Spectra.....                                                                          | 2  |
| 2. X-ray Analysis of <b>6</b> .....                                                          | 6  |
| 3. Hydrosilylation of Terminal Alkenes Catalysed by Platinum Complex <b>6</b> .....          | 6  |
| Hydrosilylation of 1-Hexene in the Presence of <b>6</b> (entry 1).....                       | 6  |
| Hydrosilylation of 1-Hexene in the Presence of <b>6</b> (entry 2).....                       | 7  |
| Hydrosilylation of Allyl Glycidyl Ether in the Presence of <b>6</b> (entry 6).....           | 7  |
| Hydrosilylation of Allyl Glycidyl Ether in the Presence of <b>6</b> (entry 7).....           | 8  |
| Hydrosilylation of Allylbis(trimethylsilyl)amine in the Presence of <b>6</b> (entry 11)..... | 8  |
| Hydrosilylation of Allylbis(trimethylsilyl)amine in the Presence of <b>6</b> (entry 12)..... | 9  |
| Hydrosilylation of Vinylcyclohexene Oxide in the Presence of <b>6</b> (entry 16).....        | 9  |
| Hydrosilylation of Allyl Acetate in the Presence of <b>6</b> (entry 20).....                 | 10 |
| Hydrosilylation of Allyl Acetate in the Presence of <b>7</b> (entry 21).....                 | 12 |
| Hydrosilylation of Allyl Acetate in the Presence of <b>2</b> (entry 22).....                 | 13 |
| Hydrosilylation of Allyl Ethyl Ether in the Presence of <b>6</b> (entry 23).....             | 13 |
| Hydrosilylation of Allyl Ethyl Ether in the Presence of <b>7</b> (entry 24).....             | 16 |
| Hydrosilylation of Allyl Ethyl Ether in the Presence of <b>2</b> (entry 25).....             | 16 |
| 4. Theoretical Calculations.....                                                             | 17 |
| 5. References.....                                                                           | 30 |

# 1. NMR Spectra

CAASi Pt DVTMS 1H NMR

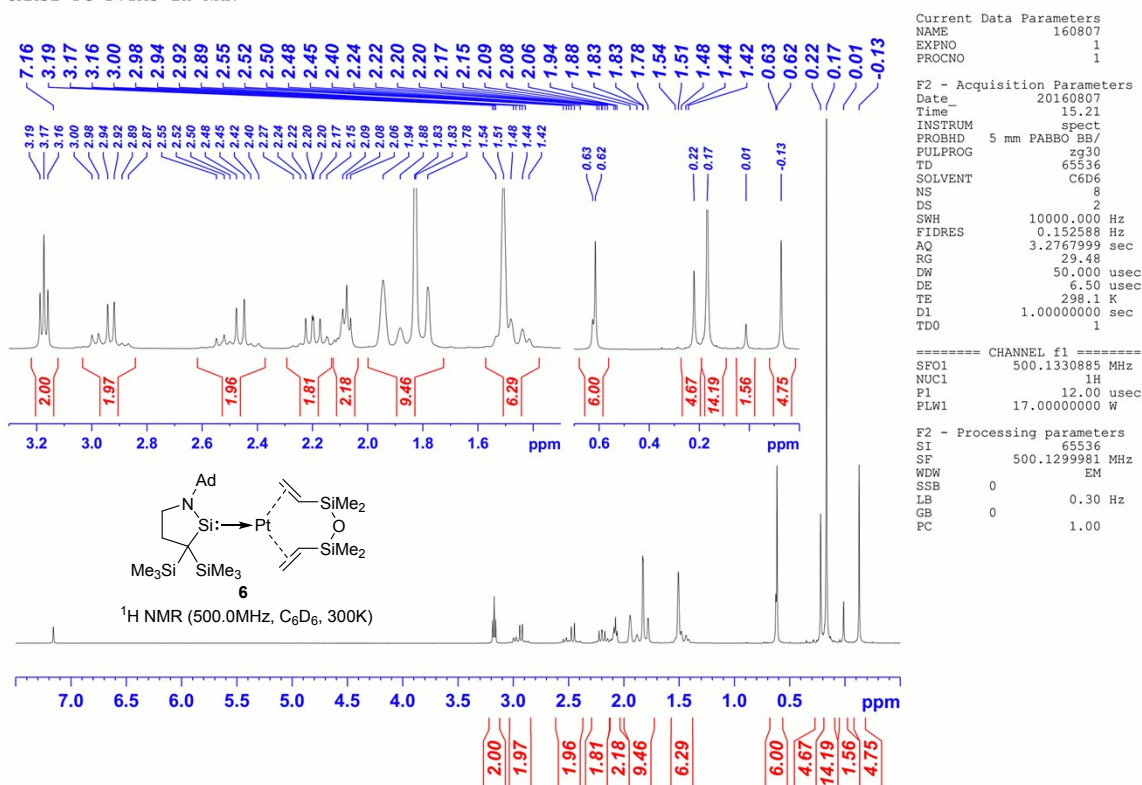

Figure S1. <sup>1</sup>H NMR spectrum of **6** in C<sub>6</sub>D<sub>6</sub> at room temperature.

CAASi Pt DVTMS 13C complete

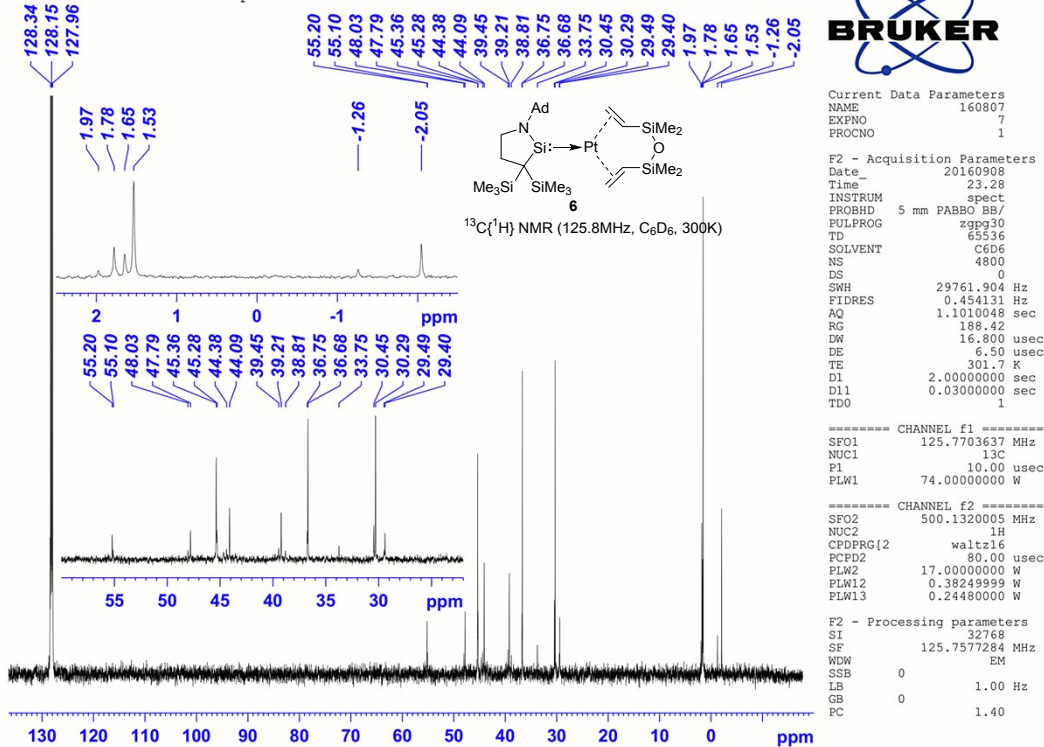

Figure S2. <sup>13</sup>C{<sup>1</sup>H} NMR spectrum of **6** in C<sub>6</sub>D<sub>6</sub> at room temperature.

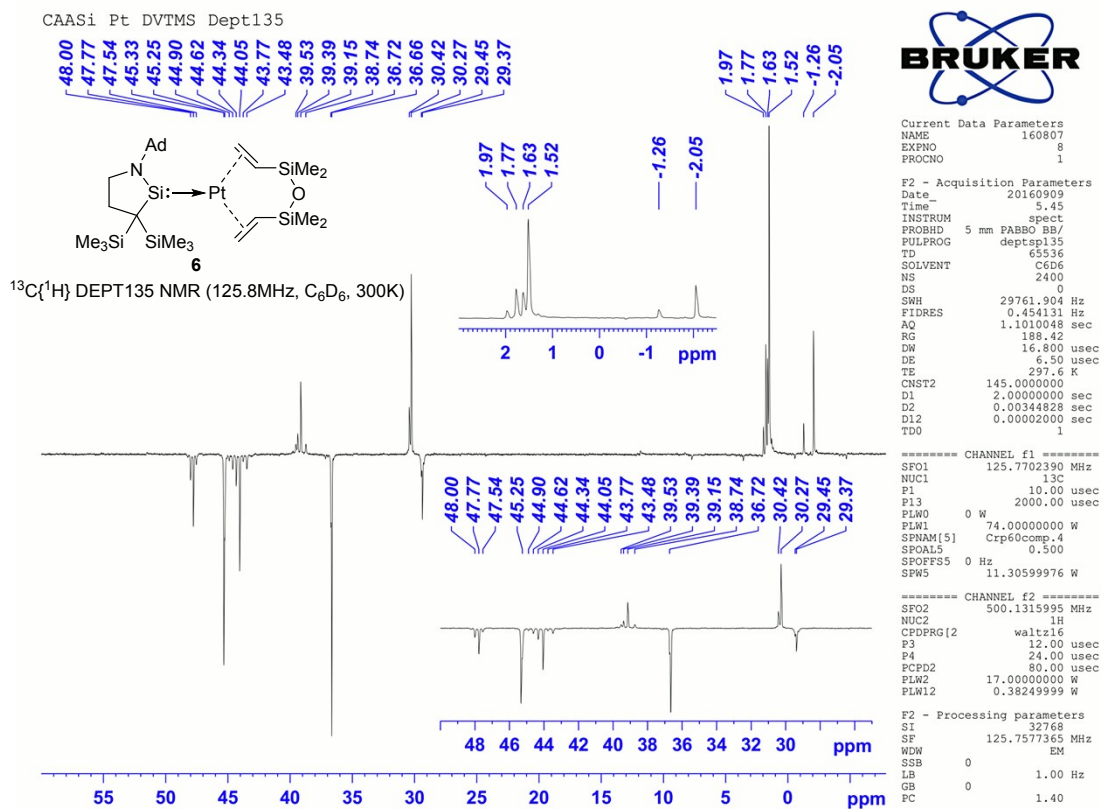

Figure S3.  $^{13}\text{C}\{^1\text{H}\}$  NMR (DEPT135) of **6** in  $\text{C}_6\text{D}_6$  at room temperature.

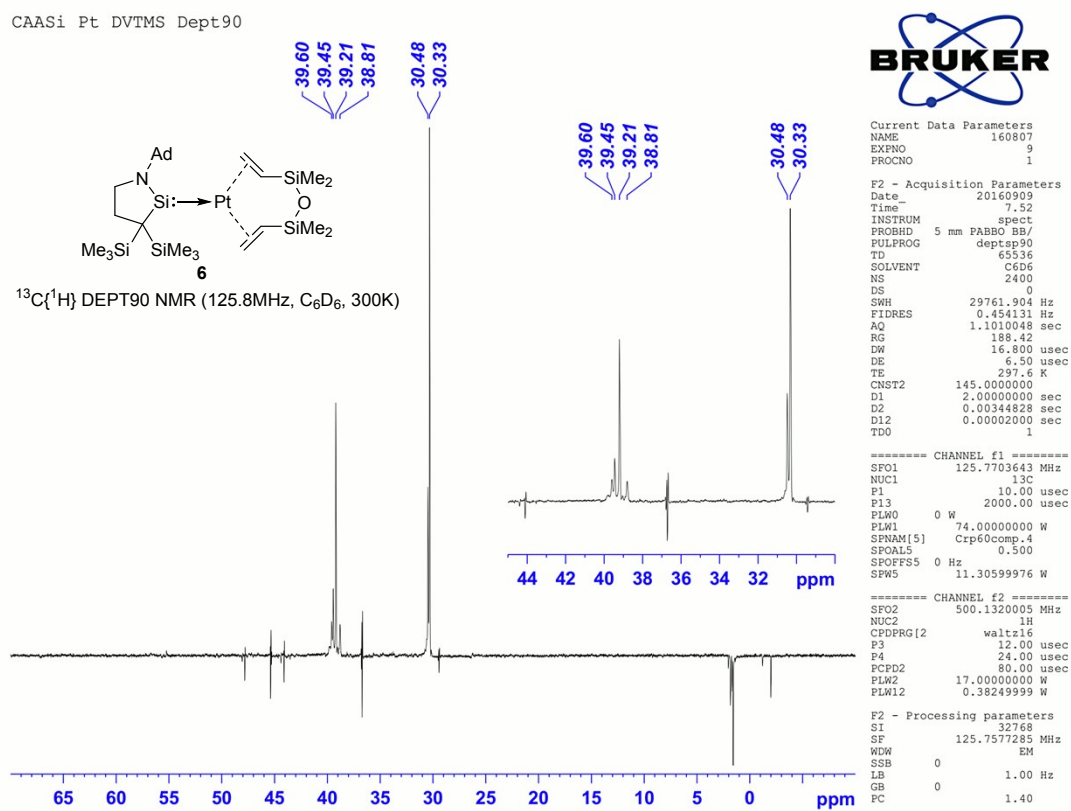

Figure S4.  $^{13}\text{C}\{^1\text{H}\}$  NMR (DEPT90) of **6** in  $\text{C}_6\text{D}_6$  at room temperature.

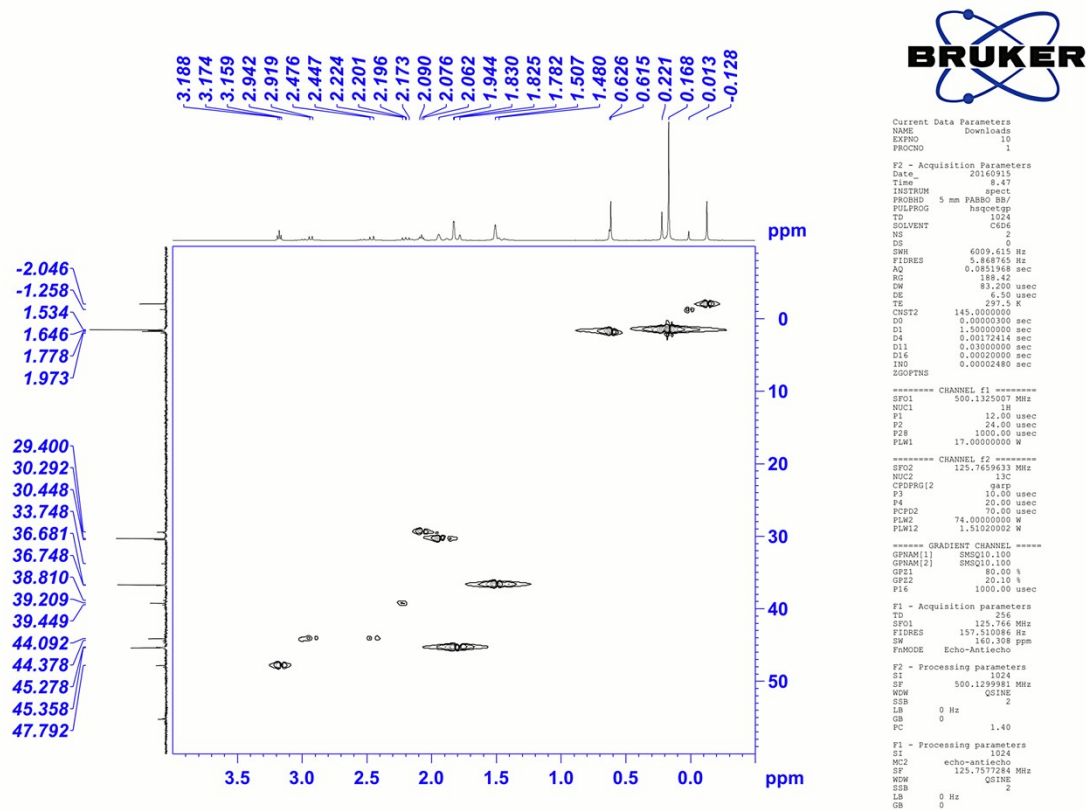

Figure S5.  $^{13}\text{C}\text{-}^1\text{H}$  NMR (HMBC) of **6** in  $\text{C}_6\text{D}_6$  at room temperature.

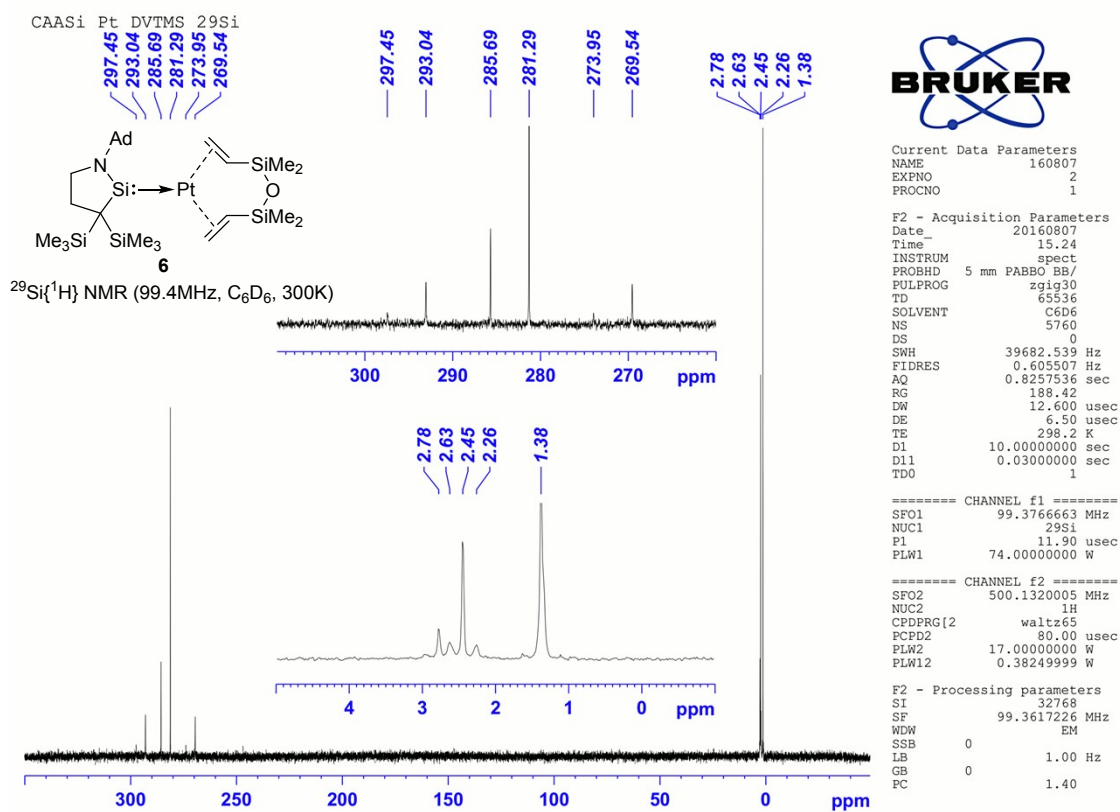

Figure S6  $^{29}\text{Si}\{^1\text{H}\}$  NMR of **6** in  $\text{C}_6\text{D}_6$  at room temperature.

CAAsi Pt DVTMS 195Pt

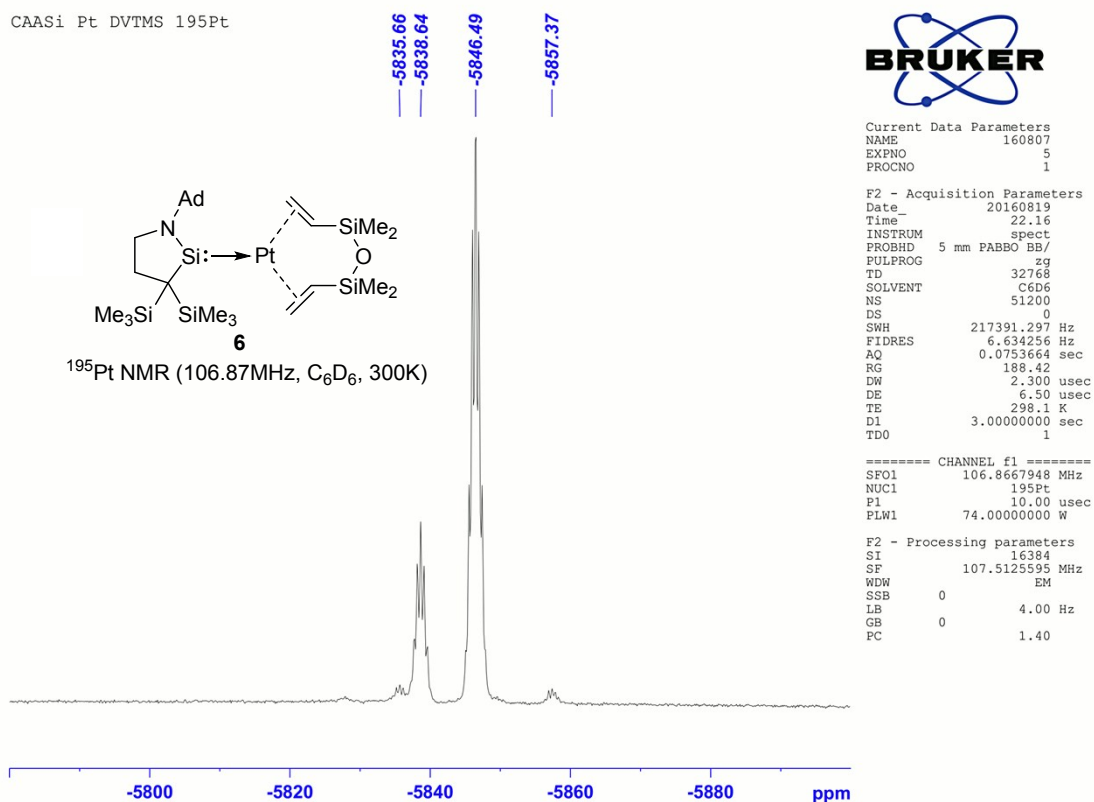

Figure S7.  $^{195}\text{Pt}$  NMR of **6** in  $\text{C}_6\text{D}_6$  at room temperature.

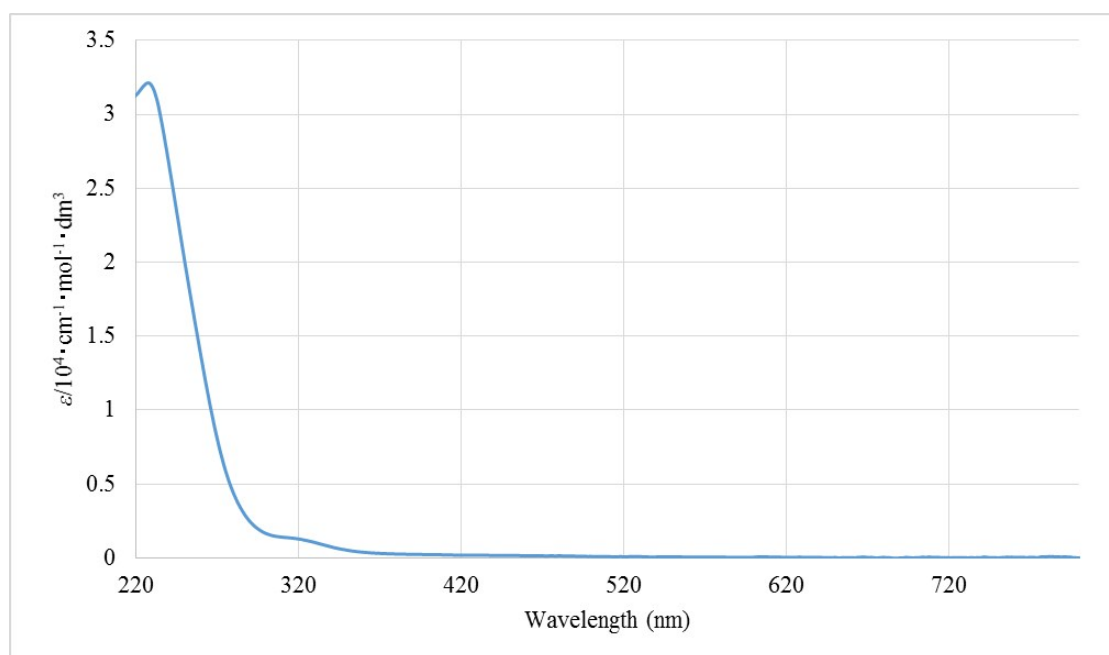

Figure S8. UV-vis spectrum of **6** in hexane at room temperature.

## 2. X-ray Analysis of 6

(a) Top view

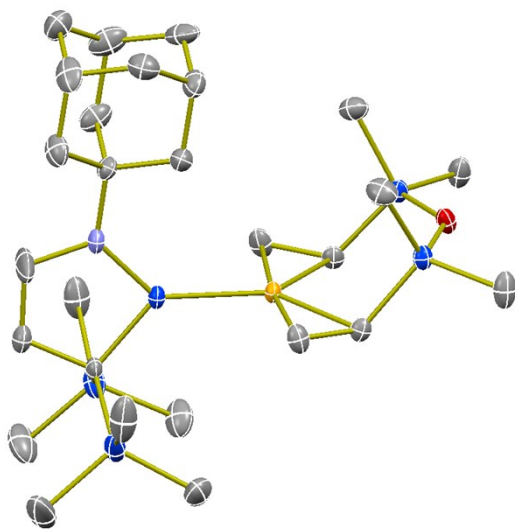

(b) Side view

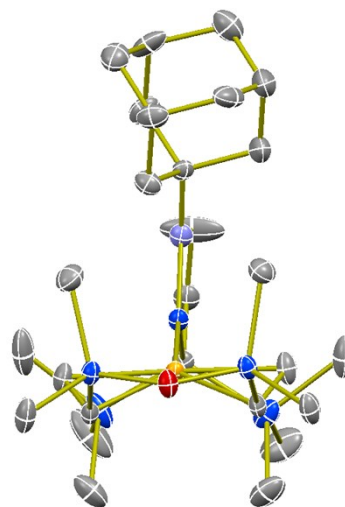

**Figure S9.** ORTEP drawings of complex **6**; top view (a) and side view (b). Thermal ellipsoids are drawn at the 50% probability level. Hydrogen atoms are omitted for clarity.

## 3. Hydrosilylation of Terminal Alkenes Catalysed by Platinum Complex 6

### Hydrosilylation of 1-Hexene in the Presence of 6 (entry 1)

CAASi Pt DVTMS Excess SiH with hexene for 50C/1h 30ppm

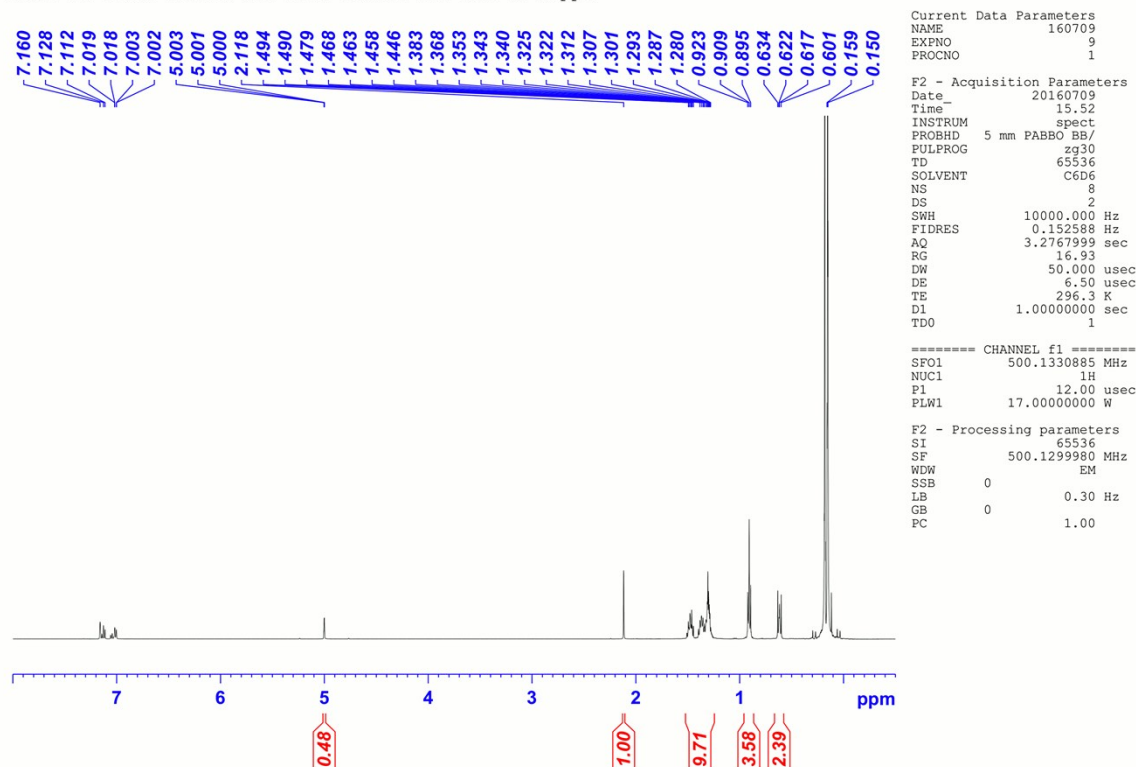

**Figure S10.**  $^1\text{H}$  NMR spectrum of reaction mixture of entry 1 ( $\text{C}_6\text{D}_6$ , room temperature).

## Hydrosilylation of 1-Hexene in the Presence of 6 (entry 2)

CAASiPt 3ppm Hexene MDHM 50C 1h

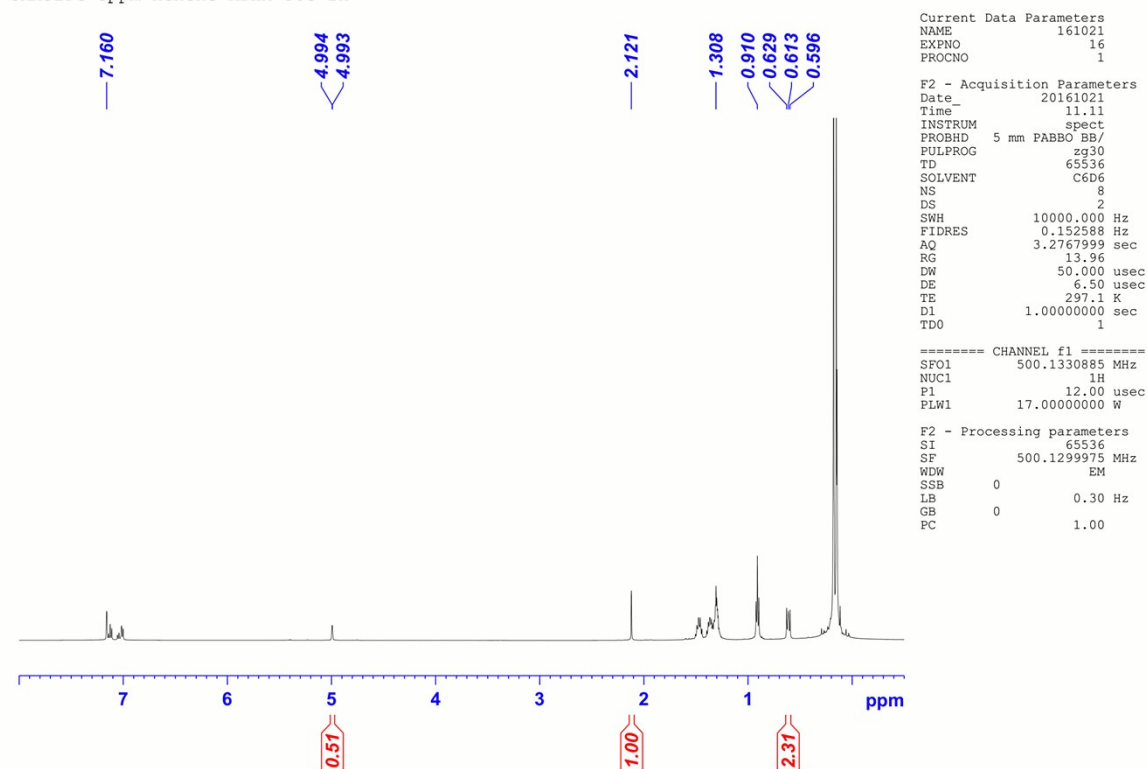

Figure S11. <sup>1</sup>H NMR spectrum of reaction mixture of entry 2 (C<sub>6</sub>D<sub>6</sub>, room temperature).

## Hydrosilylation of Allyl Glycidyl Ether in the Presence of 6 (entry 6)

CAASi Pt DVTMS Excess SiH with AGE for 5h/50C

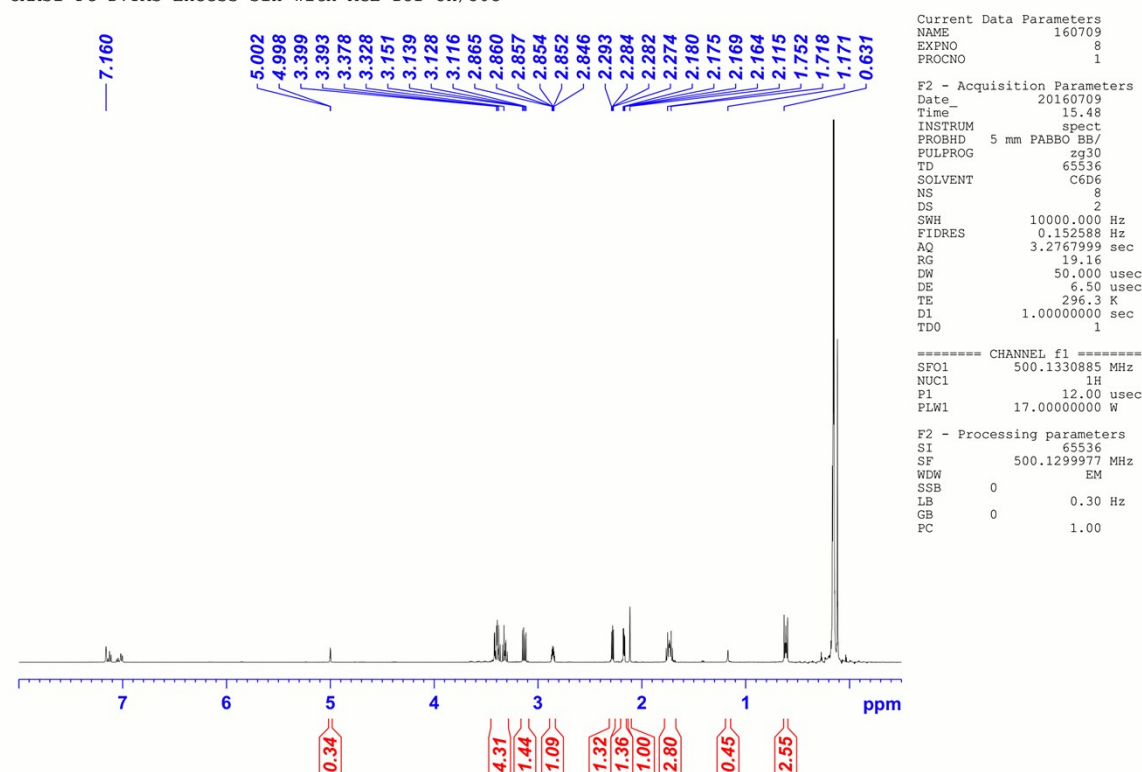

Figure S12. <sup>1</sup>H NMR spectrum of reaction mixture of entry 6 (C<sub>6</sub>D<sub>6</sub>, room temperature).

## Hydrosilylation of Allyl Glycidyl Ether in the Presence of 6 (entry 7)

CAASiPt 3ppm MDHM AGE 50C 1h

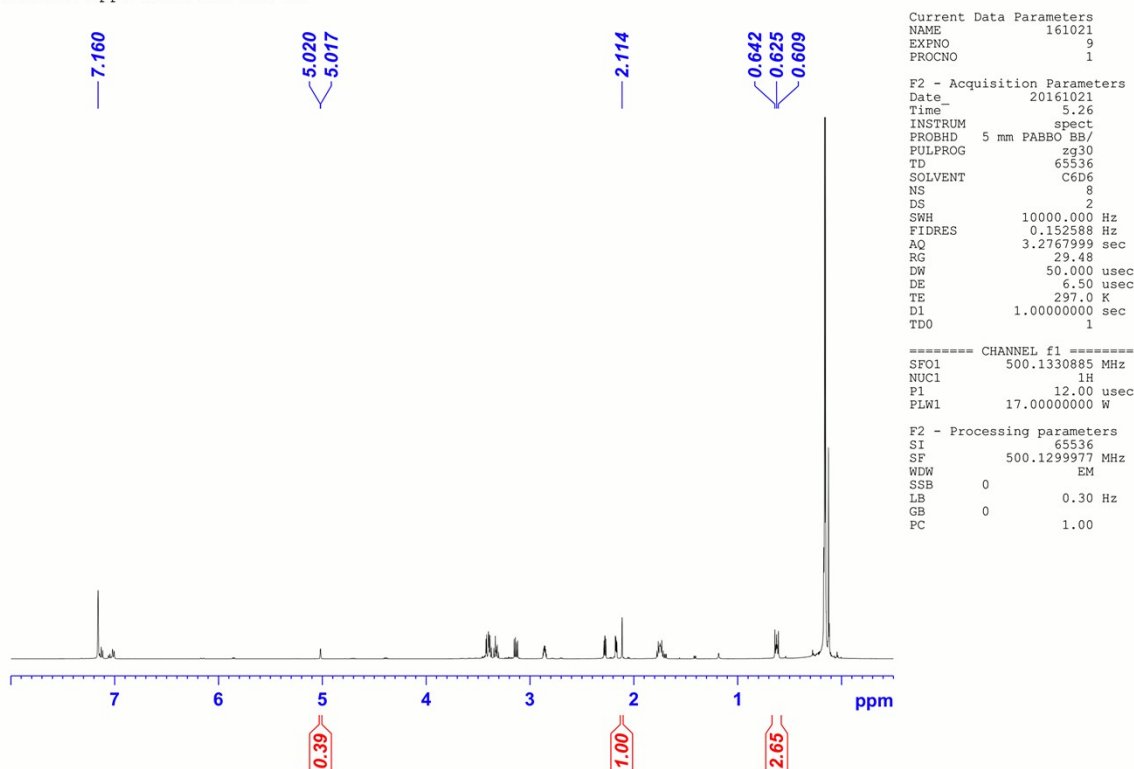

Figure S13. <sup>1</sup>H NMR spectrum of reaction mixture of entry 7 (C<sub>6</sub>D<sub>6</sub>, room temperature).

## Hydrosilylation of Allylbis(trimethylsilyl)amine in the Presence of 6 (entry 11)

CAASiPtDVTMS 30ppm Excess SiH bisTMSallylamine 50C/5h

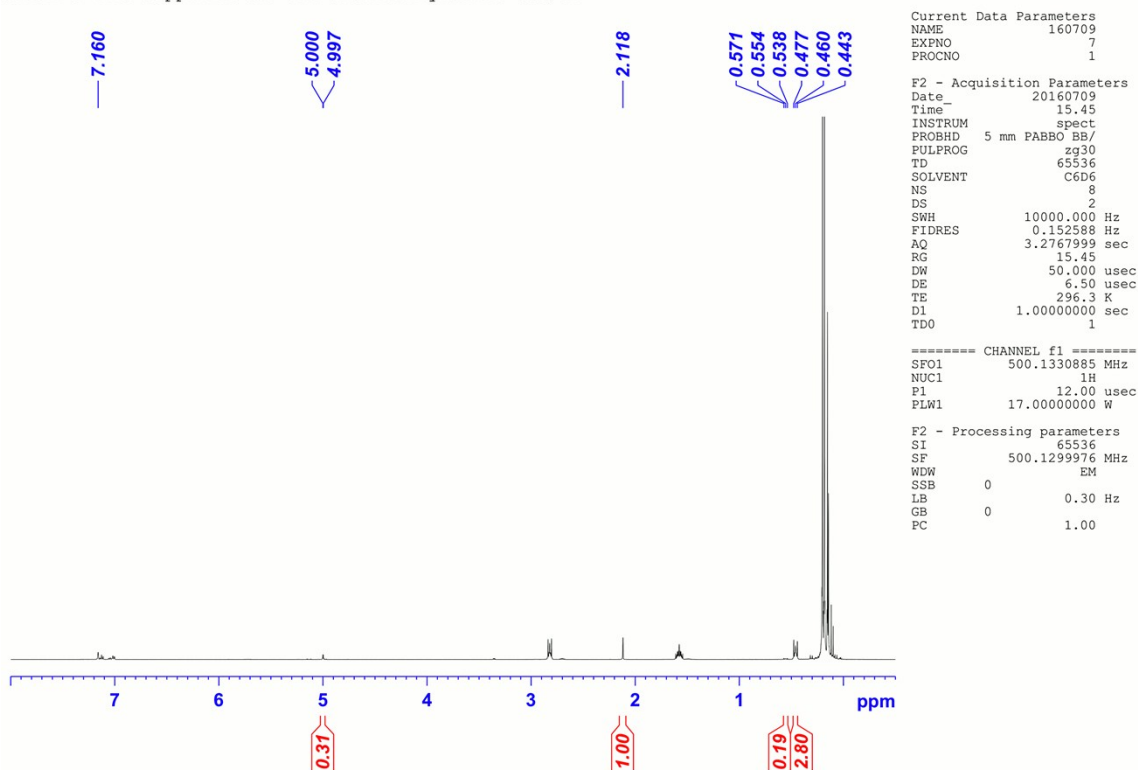

Figure S14. <sup>1</sup>H NMR spectrum of reaction mixture of entry 11 (C<sub>6</sub>D<sub>6</sub>, room temperature).



## Hydrosilylation of Allylbis(trimethylsilyl)amine in the Presence of 6 (entry 12)

CAASiPt 3ppm MDHM BisTMSallylamine 50C/1h

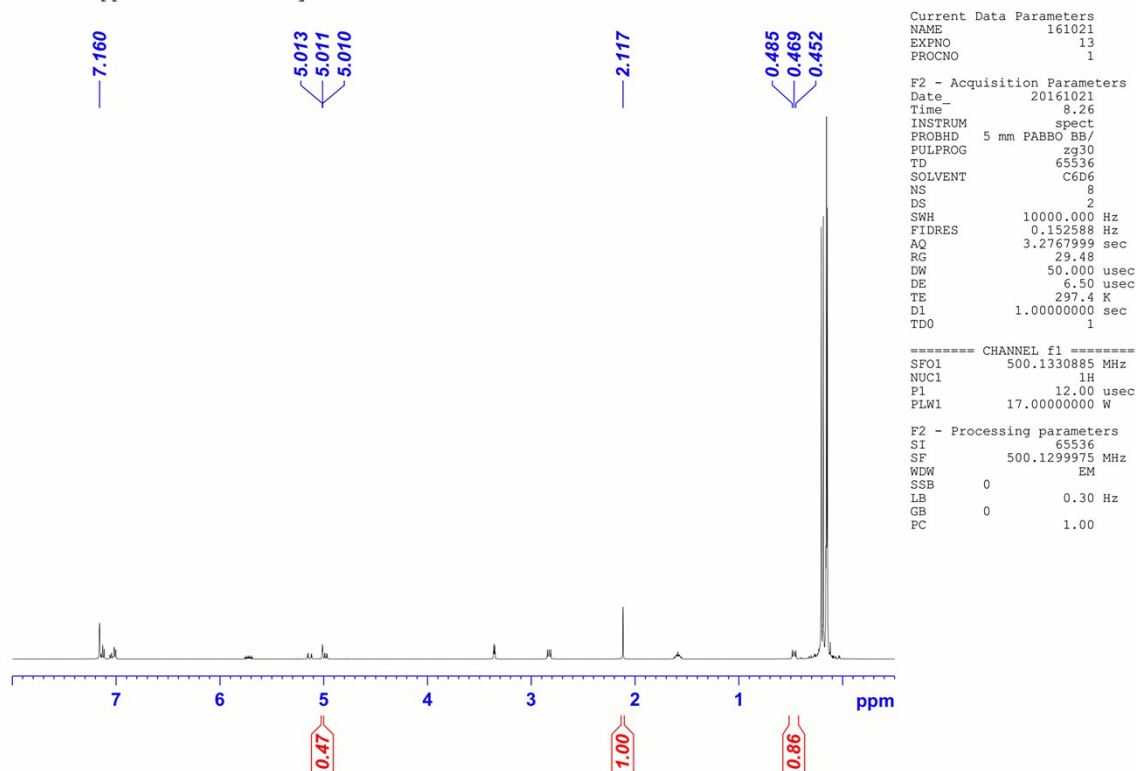

Figure S15. <sup>1</sup>H NMR spectrum of reaction mixture of entry 12 (C<sub>6</sub>D<sub>6</sub>, room temperature).

## Hydrosilylation of Vinylcyclohexene Oxide in the Presence of 6 (entry 16)

CAASiPt 3ppm CycloEp 50C/1h

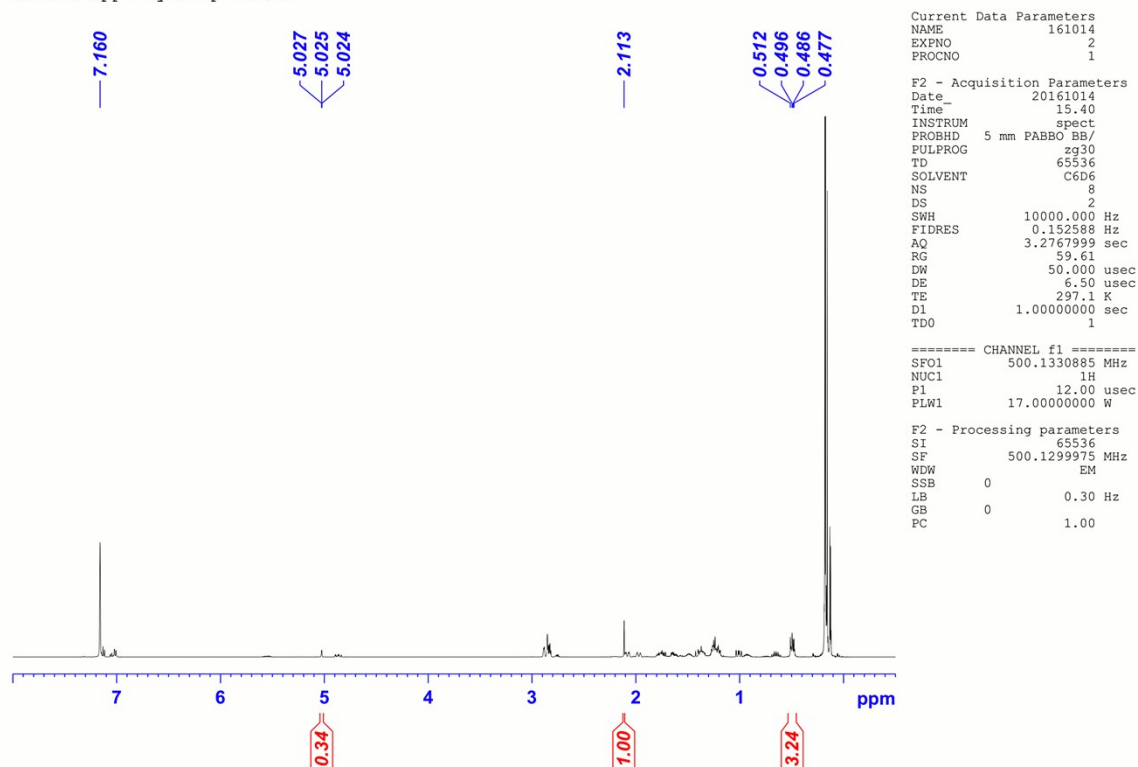

Figure S16. <sup>1</sup>H NMR spectrum of reaction mixture of entry 16 (C<sub>6</sub>D<sub>6</sub>, room temperature).

## Hydrosilylation of Allyl Acetate in the Presence of 6 (entry 20)

CAASiPt 30ppm MDHM allylacetate

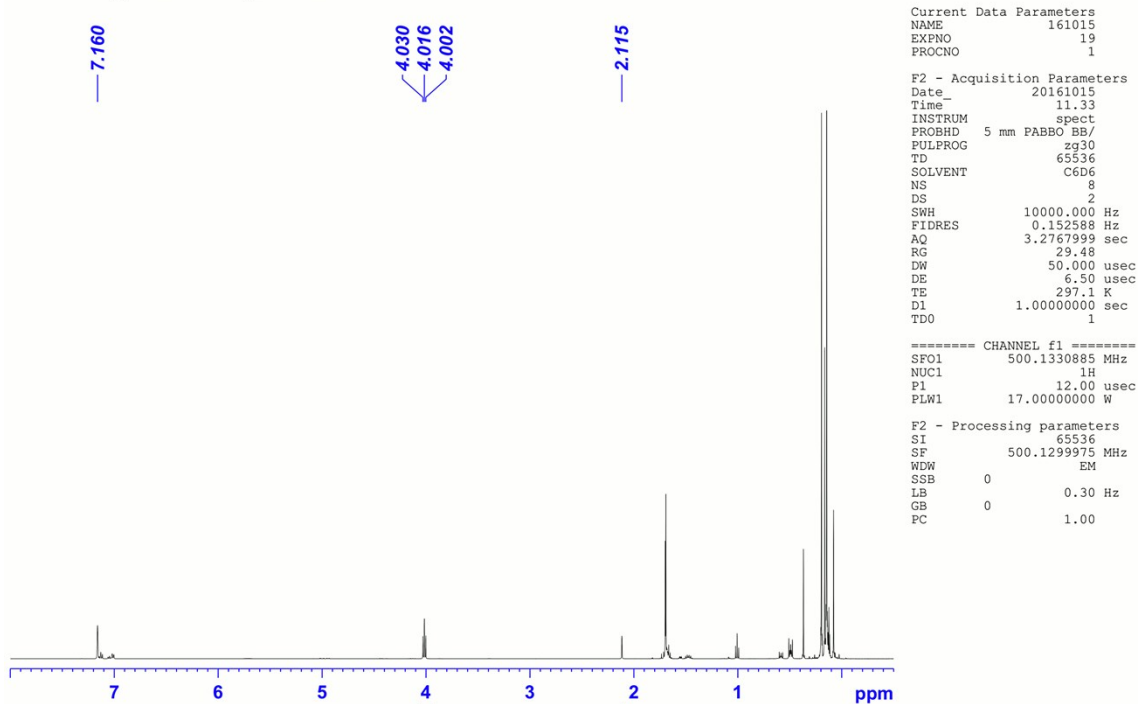

Figure S17. <sup>1</sup>H NMR spectrum of reaction mixture of entry 20 (C<sub>6</sub>D<sub>6</sub>, room temperature).

MDHM+allylacetate isolated

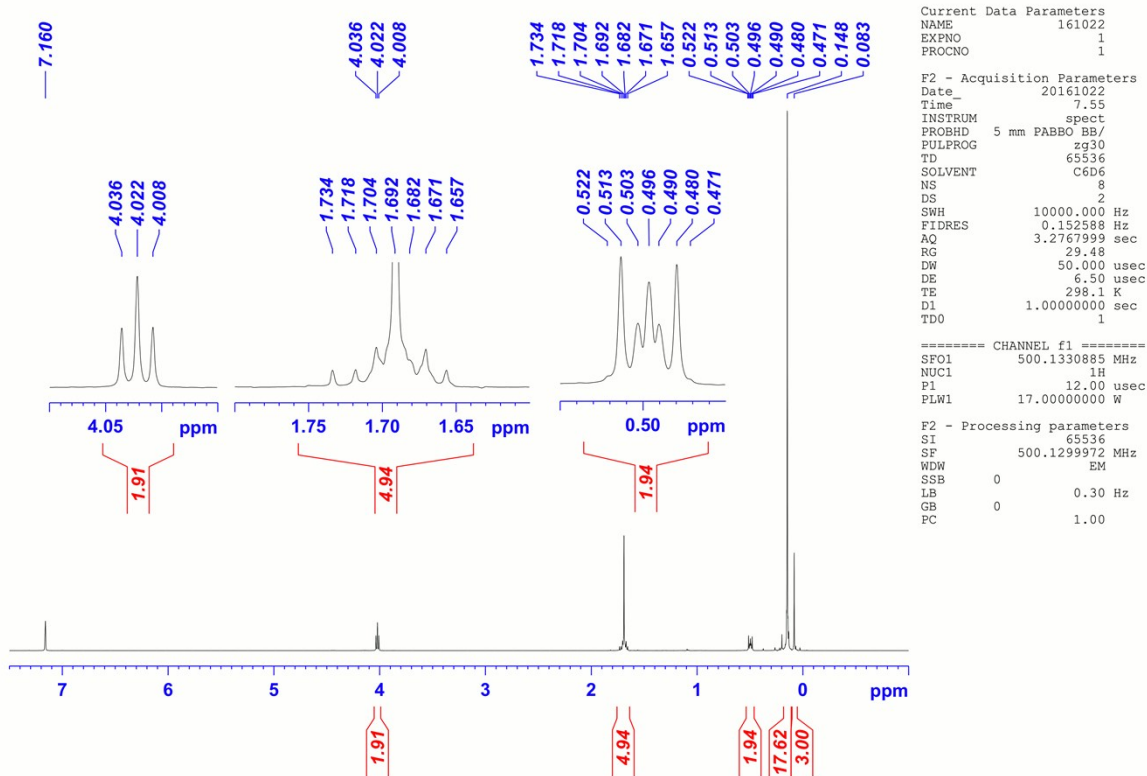

Figure S18. <sup>1</sup>H NMR spectrum of 10e (entry 20, C<sub>6</sub>D<sub>6</sub>, room temperature).

MDHM+allylacetate isolated 13C

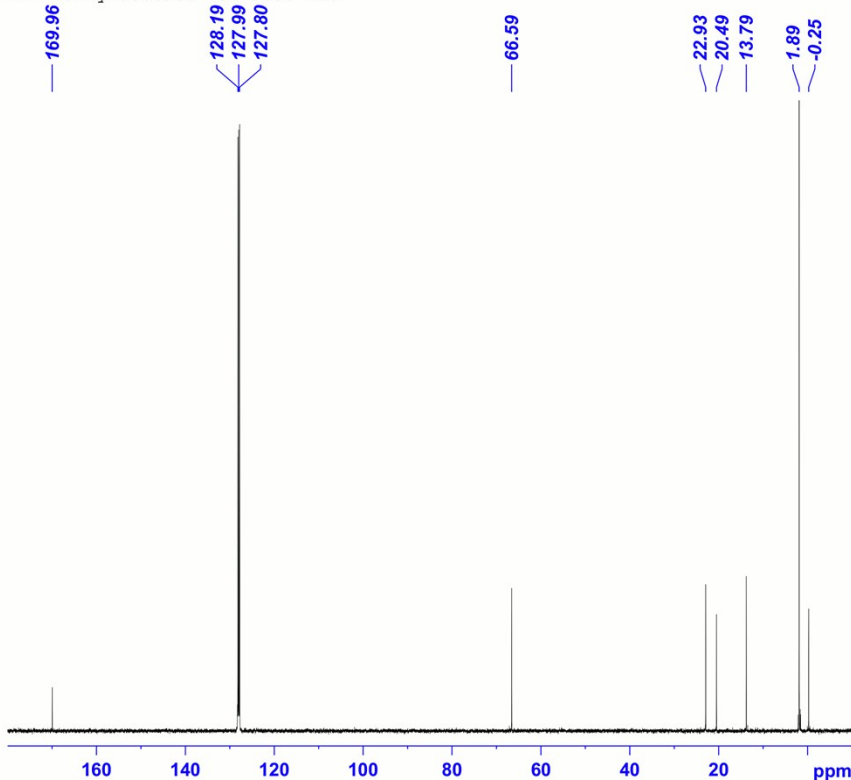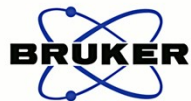

```
Current Data Parameters
NAME      161022
EXPNO    2
PROCNO   1

F2 - Acquisition Parameters
Date_    20161022
Time     8.07
INSTRUM spect
PROBHD   5 mm PABBO BB/
PULPROG zgpg30
TD       65536
SOLVENT  C6D6
NS       31
DS       4
SWH      29761.904 Hz
FIDRES   0.454131 Hz
AQ       1.1010048 sec
RG       188.42
DW       16.800 usec
DE       6.50 usec
TE       298.2 K
D1       2.0000000 sec
D11      0.0300000 sec
TD0      1

===== CHANNEL f1 =====
SFO1     125.7703637 MHz
NUC1     13C
P1       10.00 usec
PLW1     74.0000000 W

===== CHANNEL f2 =====
SFO2     500.1320005 MHz
NUC2     1H
CPDPRG[2] waltz16
PCPD2    80.00 usec
PLW2     17.0000000 W
PLW12    0.38249999 W
PLW13    0.24480000 W

F2 - Processing parameters
SI       32768
SF       125.7577454 MHz
WDW      EM
SSB      0
LB       1.00 Hz
GB       0
PC       1.40
```

Figure S19.  $^{13}\text{C}\{^1\text{H}\}$  NMR spectrum of **10e** (entry 20,  $\text{C}_6\text{D}_6$ , room temperature).

MDHM+allylacetate isolated dept135

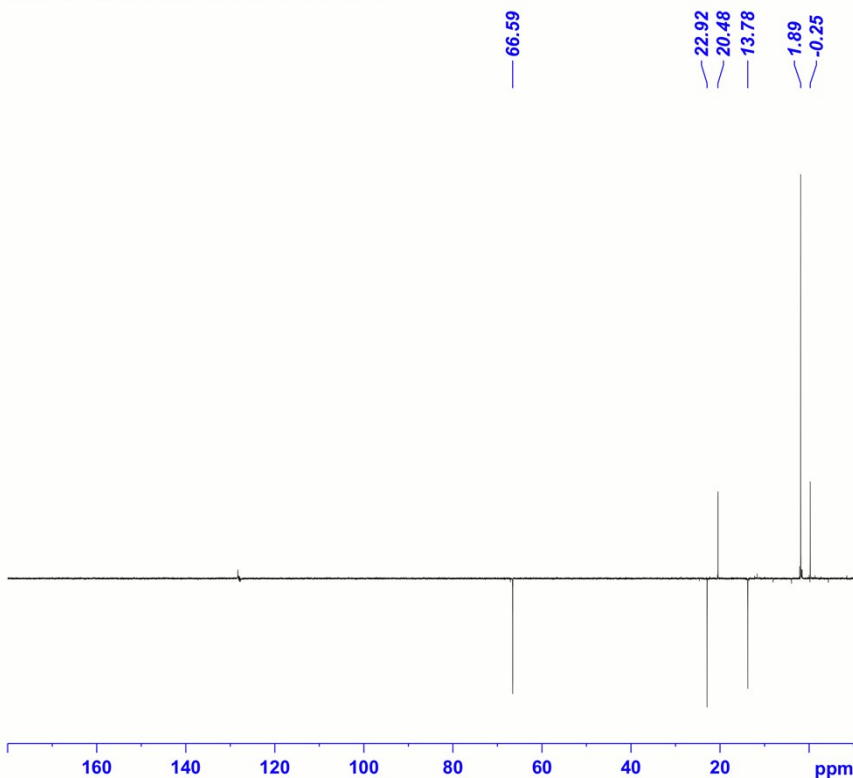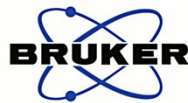

```
Current Data Parameters
NAME      161022
EXPNO    3
PROCNO   1

F2 - Acquisition Parameters
Date_    20161022
Time     8.09
INSTRUM spect
PROBHD   5 mm PABBO BB/
PULPROG deptsp135
TD       65536
SOLVENT  C6D6
NS       34
DS       4
SWH      29761.904 Hz
FIDRES   0.454131 Hz
AQ       1.1010048 sec
RG       188.42
DW       16.800 usec
DE       6.50 usec
TE       298.1 K
CNST2    145.0000000
D1       2.0000000 sec
D2       0.00344828 sec
D12      0.00002000 sec
TD0      1

===== CHANNEL f1 =====
SFO1     125.7702390 MHz
NUC1     13C
P1       10.00 usec
P13      2000.00 usec
PLW0     0 W
PLW1     74.0000000 W
SFNAM[5] Crp60comp.4
SFOAL5   0 Hz
SFOFFS5  0 Hz
SFWS     11.30599976 W

===== CHANNEL f2 =====
SFO2     500.1315995 MHz
NUC2     1H
CPDPRG[2] waltz16
F3       12.00 usec
F4       24.00 usec
PCPD2    80.00 usec
PLW2     17.0000000 W
PLW12    0.38249999 W

F2 - Processing parameters
SI       32768
SF       125.7577464 MHz
WDW      EM
SSB      0
LB       1.00 Hz
GB       0
PC       1.40
```

Figure S20.  $^{13}\text{C}\{^1\text{H}\}$  NMR (DEPT135) NMR spectrum of isolated **10e** (entry 20,  $\text{C}_6\text{D}_6$ , room temperature).

MDHM+allylacetate isolated 29Si

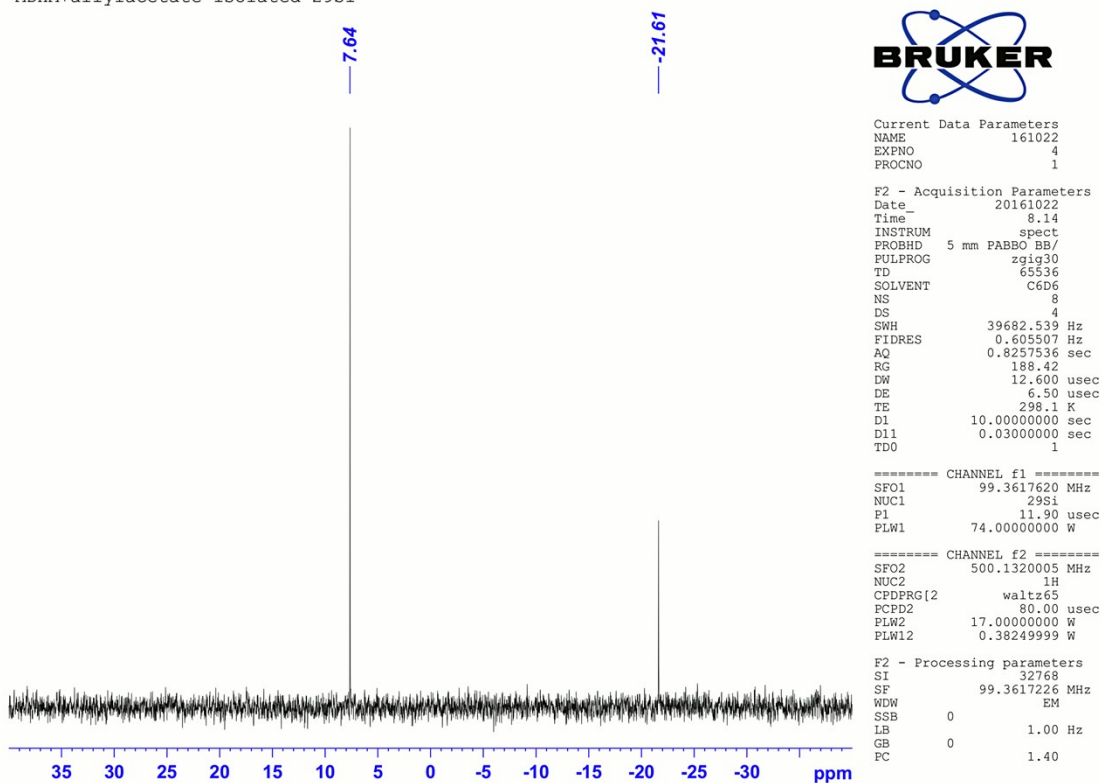

Figure S21.  $^{29}\text{Si}\{^1\text{H}\}$  NMR spectrum of 10e (entry 20,  $\text{C}_6\text{D}_6$ , room temperature).

### Hydrosilylation of Allyl Acetate in the Presence of 7 (entry 21)

MDHM allylacetate karstedtPt 30ppm 50C 1h

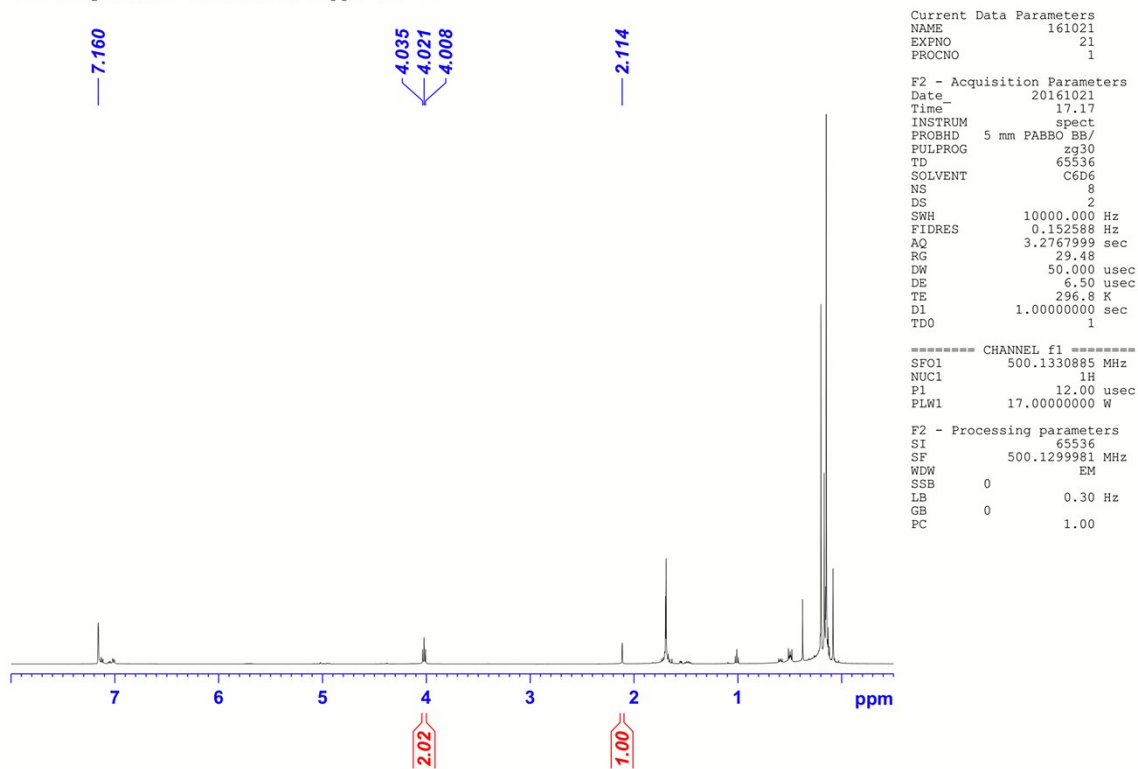

Figure S22.  $^1\text{H}$  NMR spectrum of reaction mixture of entry 21 ( $\text{C}_6\text{D}_6$ , room temperature).

## Hydrosilylation of Allyl Acetate in the Presence of 2 (entry 22)

helmetPt 30ppm allylacetate

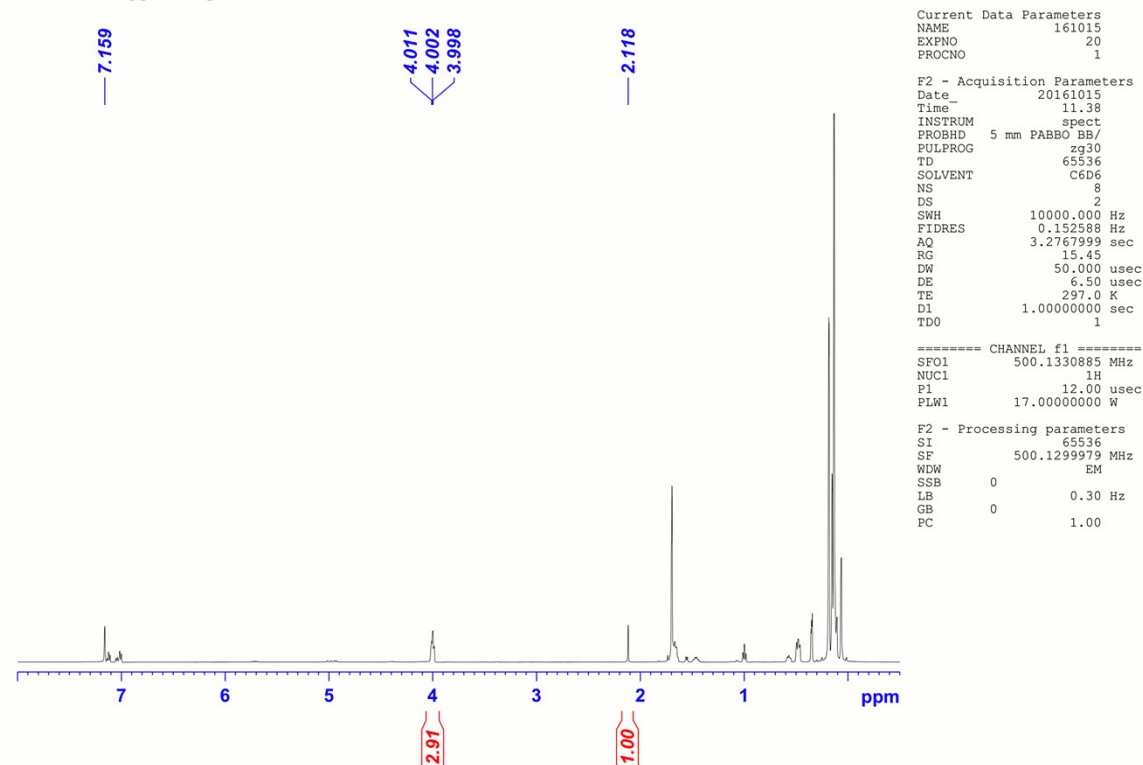

Figure S23. <sup>1</sup>H NMR spectrum of reaction mixture of entry 22 (C<sub>6</sub>D<sub>6</sub>, room temperature).

## Hydrosilylation of Allyl Ethyl Ether in the Presence of 6 (entry 23)

CAASiPt 3ppm MDHM allylethylether 50C 1h

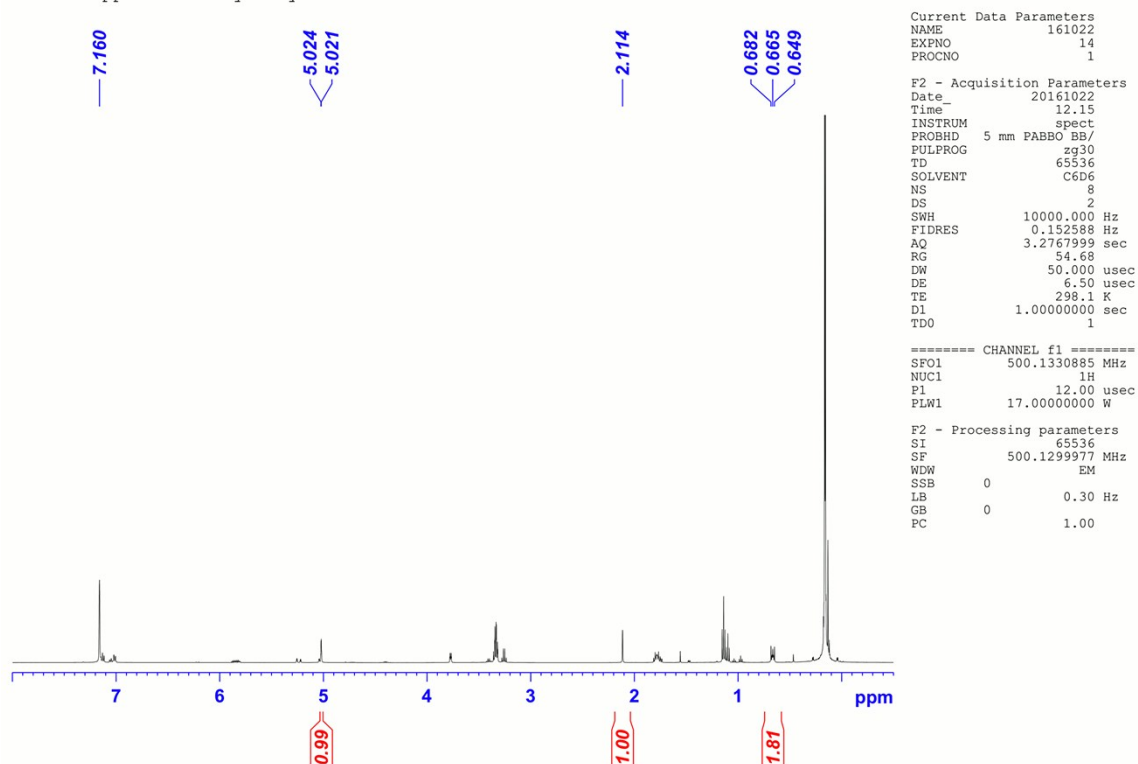

Figure S24. <sup>1</sup>H NMR spectrum of reaction mixture of entry 23 (C<sub>6</sub>D<sub>6</sub>, room temperature).

MDHM allylethylether CAASiPt 50C 1h isolated

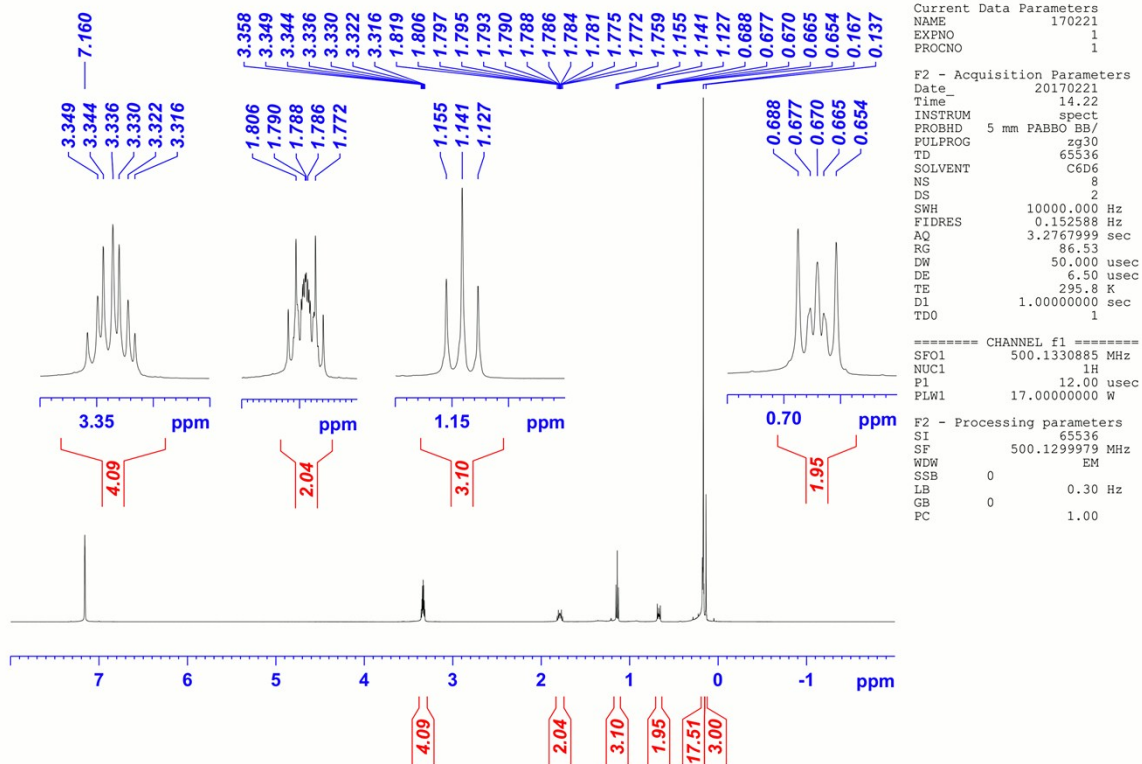

Figure S25. <sup>1</sup>H NMR spectrum of **10f** (C<sub>6</sub>D<sub>6</sub>, room temperature).

<sup>13</sup>C MDHM allylethylether CAASiPt 50C 1h isolated

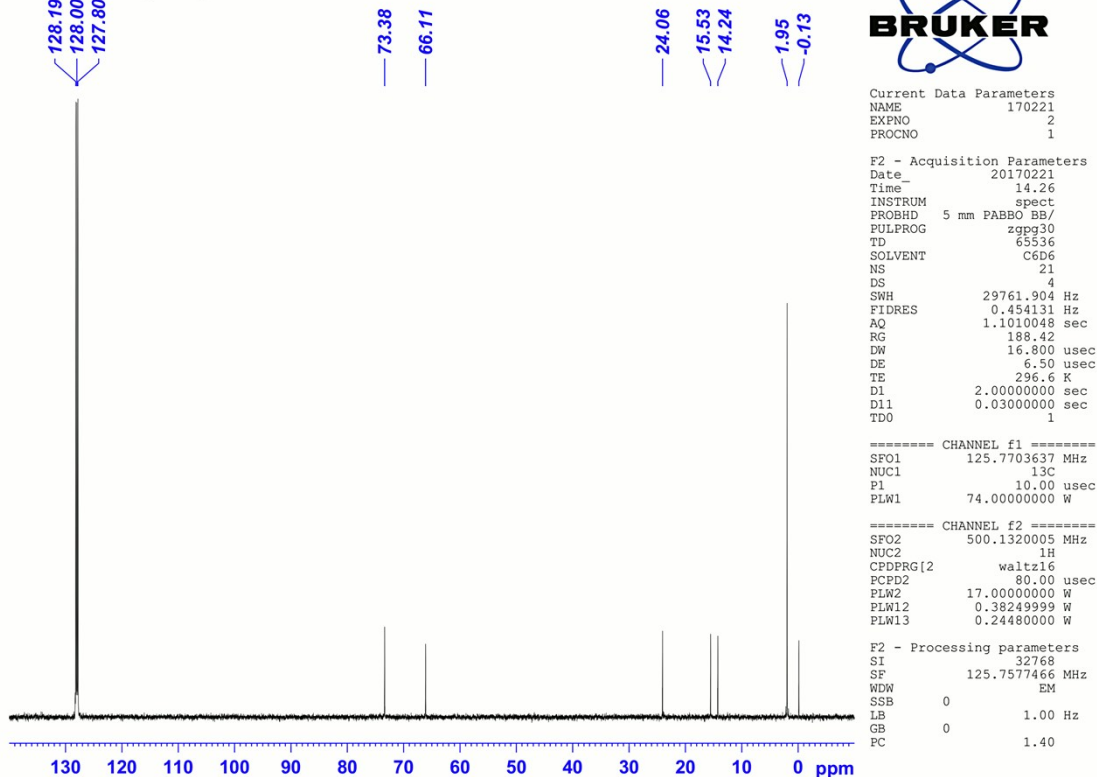

Figure S26. <sup>13</sup>C{<sup>1</sup>H} NMR spectrum of **10f** (C<sub>6</sub>D<sub>6</sub>, room temperature).

dept135 MDHM allylethylether CAASiPt 50C 1h isolated

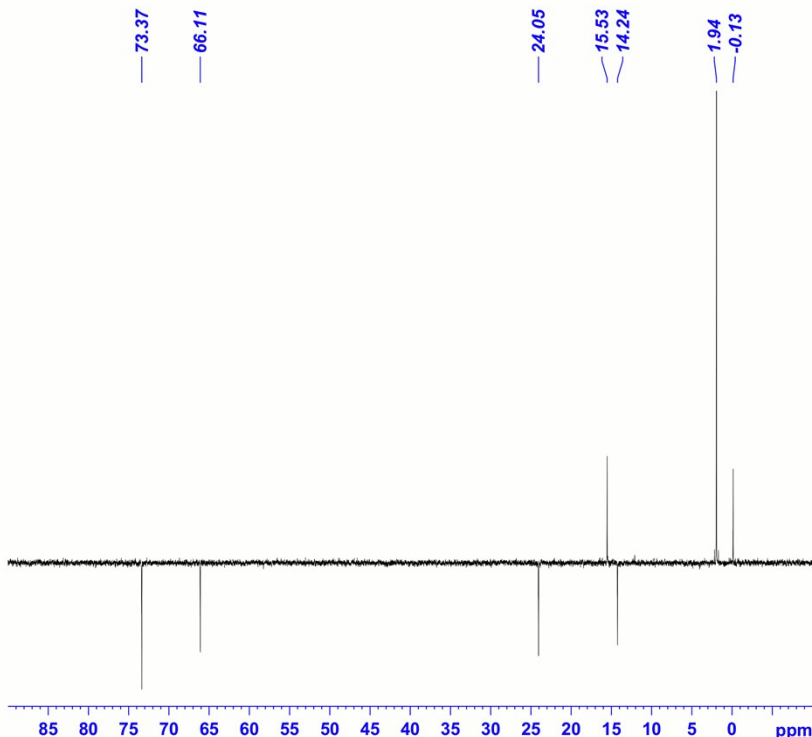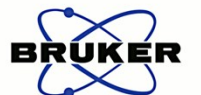

```
Current Data Parameters
NAME      170221
EXPNO     3
PROCNO    1

F2 - Acquisition Parameters
Date_     20170221
Time      14.29
INSTRUM   spect
PROBHD    5 mm PABBO BB/
PULPROG   deptsp135
TD         65536
SOLVENT   C6D6
NS         12
DS         4
SWH        20161.291 Hz
FIDRES     0.307637 Hz
AQ         1.6252928 sec
RG         188.42
DW         24.800 usec
DE         6.50 usec
TE         296.3 K
CNST2     145.0000000
D1         2.0000000 sec
D2         0.00344828 sec
D12        0.00002000 sec
TD0        1

===== CHANNEL f1 =====
SFO1      125.7647057 MHz
NUC1       13C
P1         10.00 usec
P13        2000.00 usec
PLW0       0 W
PLW1       74.00000000 W
SPNAM[5]   Crp60comp.4
SFOALS     0 Hz
SPOFFS5    0 Hz
SPW5       11.30599976 W

===== CHANNEL f2 =====
SFO2      500.1315995 MHz
NUC2       1H
CPDPRG[2]  waltz16
P3         12.00 usec
P4         24.00 usec
PCPD2     80.00 usec
PLW2      17.00000000 W
PLW12     0.38249999 W

F2 - Processing parameters
SI         32768
SF         125.7577473 MHz
WDW        EM
SSB        0
LB         1.00 Hz
GB         0
PC         1.40
```

Figure S27.  $^{13}\text{C}\{^1\text{H}\}$  NMR (DEPT135) NMR spectrum of **10f** ( $\text{C}_6\text{D}_6$ , room temperature).

29Si MDHM allylethylether CAASiPt 50C 1h isolated

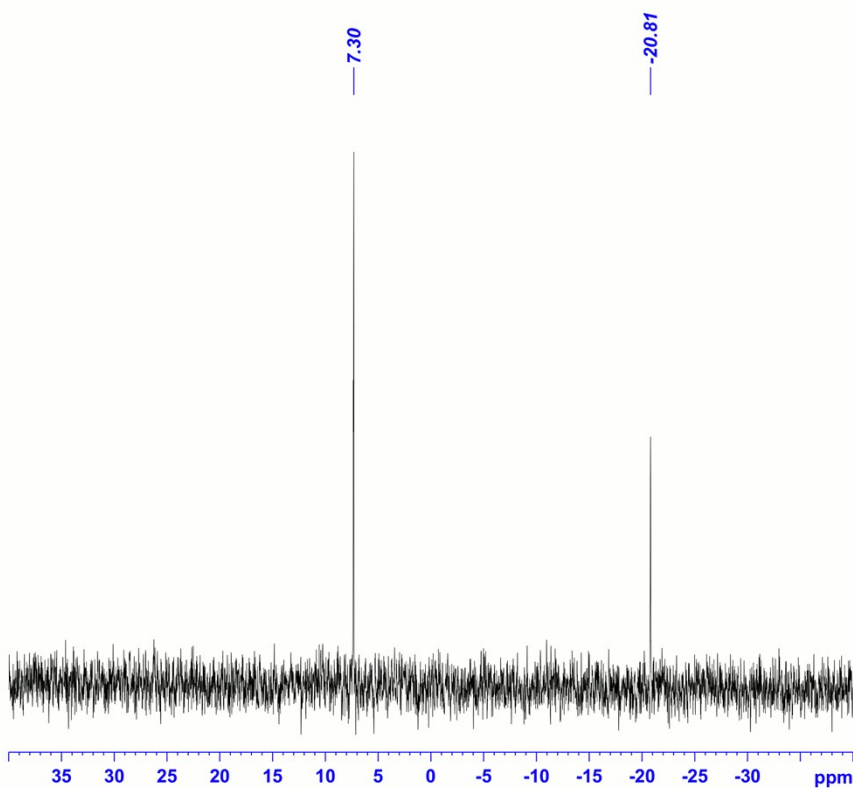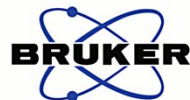

```
Current Data Parameters
NAME      170221
EXPNO     7
PROCNO    1

F2 - Acquisition Parameters
Date_     20170221
Time      15.25
INSTRUM   spect
PROBHD    5 mm PABBO BB/
PULPROG   zgig30
TD         65536
SOLVENT   C6D6
NS         8
DS         2
SWH        39682.539 Hz
FIDRES     0.605507 Hz
AQ         0.8257536 sec
RG         188.42
DW         12.600 usec
DE         6.50 usec
TE         296.0 K
D1         10.00000000 sec
D11        0.03000000 sec
TD0        1

===== CHANNEL f1 =====
SFO1      99.3617620 MHz
NUC1       29Si
P1         11.90 usec
PLW1       74.00000000 W

===== CHANNEL f2 =====
SFO2      500.1320005 MHz
NUC2       1H
CPDPRG[2]  waltz65
PCPD2     80.00 usec
PLW2      17.00000000 W
PLW12     0.38249999 W

F2 - Processing parameters
SI         32768
SF         99.3617226 MHz
WDW        EM
SSB        0
LB         1.00 Hz
GB         0
PC         1.40
```

Figure S28.  $^{29}\text{Si}\{^1\text{H}\}$  NMR spectrum of **10f** ( $\text{C}_6\text{D}_6$ , room temperature).

## Hydrosilylation of Allyl Ethyl Ether in the Presence of 7 (entry 24)

MDHM allylethylether karstedt3ppm 50C 1h

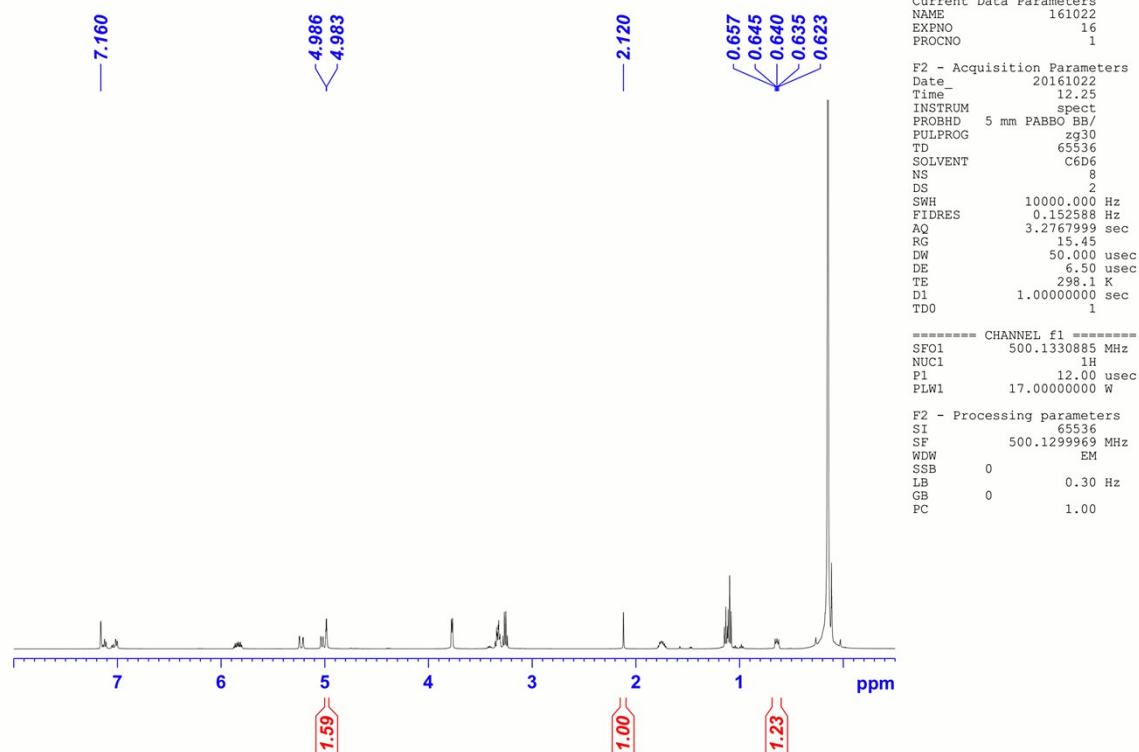

Figure S29. <sup>1</sup>H NMR spectrum of reaction mixture of entry 24 (C<sub>6</sub>D<sub>6</sub>, room temperature).

## Hydrosilylation of Allyl Ethyl Ether in the Presence of 2 (entry 25)

MDHM allylethylether helmet3ppm 50C 1h

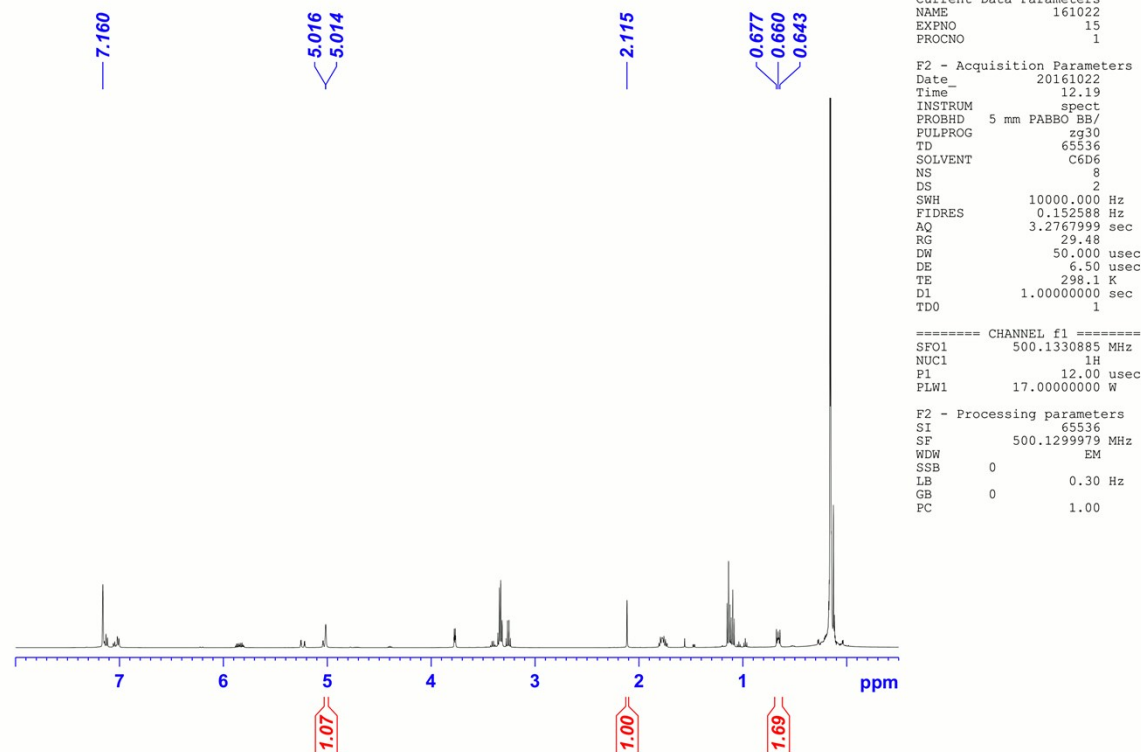

Figure S30. <sup>1</sup>H NMR spectrum of reaction mixture of entry 25 (C<sub>6</sub>D<sub>6</sub>, room temperature).



## 4. Theoretical Calculations

The geometry optimization of **6** was performed at the various levels of theory and the Pt–Si, Pt–C(vinyl) and C=C distances obtained at the PBE0/def2-tzvp level of theory is in good agreement with those obtained by X-ray diffraction study (Table 1).

**Table S1.** Selected Structural Parameters of **6<sub>opt</sub>** and **2<sub>opt</sub>** Calculated at Various Level of Theory.

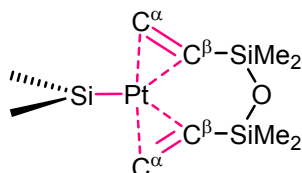

| Cpd                     | Functional/Basis Set                      | distances/Å [WBI]      |                           |                       |                                |          |                                       | NPA Charges |             |
|-------------------------|-------------------------------------------|------------------------|---------------------------|-----------------------|--------------------------------|----------|---------------------------------------|-------------|-------------|
|                         |                                           | Si–Pt                  | Pt–C <sup>α</sup>         | Pt–C <sup>β</sup>     | C <sup>α</sup> –C <sup>β</sup> | Si–N(Ad) | Si–C(SiMe <sub>3</sub> ) <sub>2</sub> | Pt          | Si          |
| <b>6a</b><br>(exp)      | XRD (mol. 1)                              | 2.2504(8)              | 2.139(3)                  | 2.162(3),<br>2.145(3) | 1.421(5)<br>1.422(4)           | 1.690(3) | 1.870(3)                              | –           | –           |
|                         | XRD (mol. 2)                              | 2.2481(8)              | 2.146(3),<br>2.147(3)     | 2.160(3),<br>2.158(3) | 1.427(4)<br>1.422(4)           | 1.698(3) | 1.873(3)                              | –           | –           |
| <b>6a<sub>opt</sub></b> | B3PW91-D3/B                               | 2.255                  | 2.163<br>2.172            | 2.183<br>2.178        | 1.421<br>1.423                 | 1.715    | 1.875                                 | 0.221       | 1.441       |
|                         | PBE0-D3/B                                 | 2.2633                 | 2.152<br>2.161            | 2.169<br>2.164        | 1.421<br>1.423                 | 1.715    | 1.879                                 | 0.231       | 1.446       |
|                         | B3LYP-D3/B                                | 2.268                  | 2.197<br>2.202            | 2.222<br>2.218        | 1.417<br>1.421                 | 1.720    | 1.890                                 | 0.213       | 1.405       |
|                         | M06-2X/B                                  | 2.238                  | 2.158<br>2.168            | 2.184<br>2.180        | 1.417<br>1.419                 | 1.716    | 1.880                                 | 0.208       | 1.498       |
| <b>6b<sub>opt</sub></b> | B3PW91-D3/B                               | 2.259                  | 2.174<br>2.163            | 2.180<br>2.183        | 1.422<br>1.421                 | 1.718    | 1.903                                 | 0.219       | 1.446       |
|                         | <b>TS<sub>opt</sub></b><br><b>(6a-6b)</b> | 2.299                  | 2.181<br>2.176            | 2.202<br>2.198        | 1.410<br>1.413                 | 1.736    | 1.913                                 | –           | –           |
| <b>2</b> (exp)          | XRD <sup>S1</sup>                         | 2.2572(13)             | 2.175(5)<br>2.170(5)      | 2.177(5)<br>2.181(5)  | 1.424(6)<br>1.415(6)           | –        | 1.911-1.917                           | –           | –           |
|                         |                                           | <b>2<sub>opt</sub></b> | B3PW91-D3/B <sup>S1</sup> | 2.257                 | 2.182                          | 2.202    | 1.415                                 | –           | 1.914-1.918 |

a. Basis B: SDD [Pt] and 6-311G(d) [H, C, N, O, Si]

**Table S2.** Atomic Coordinates of **6a<sub>opt</sub>** at the B3PW91-D3/B Level of Theory

(B: SDD [Pt], 6-311G(d) [H, C, N, O, Si])

| Atom | X               | Y               | Z               |
|------|-----------------|-----------------|-----------------|
| Pt   | -0.584395959265 | -1.088374119769 | 0.008052072335  |
| C    | -0.741073032118 | -1.641135797848 | 2.093830725154  |
| H    | 0.100756766131  | -2.235353696725 | 2.440457335456  |
| H    | -0.938901431050 | -0.765982886407 | 2.709911930398  |
| C    | -1.802246772827 | -2.266246241981 | 1.384840927670  |
| H    | -1.662889356702 | -3.319298346977 | 1.131614690558  |
| C    | -0.713384280243 | -0.689490585043 | -2.123123229752 |
| H    | 0.140491513916  | -1.049993180876 | -2.690751466741 |
| H    | -0.947997274848 | 0.356300438935  | -2.315675607374 |
| C    | -1.752108107619 | -1.592007725262 | -1.760638547994 |
| H    | -1.566361156851 | -2.646425806979 | -1.977814896197 |
| Si   | -3.554704253506 | -1.626395988032 | 1.399761357490  |
| Si   | -3.544203547239 | -1.091148880968 | -1.598952295456 |
| O    | -4.164859810087 | -1.621707704987 | -0.149485080647 |
| C    | -3.683617167666 | 0.778641908754  | -1.671208371687 |
| H    | -3.354642416941 | 1.180660137938  | -2.634527777169 |
| H    | -4.720395582051 | 1.092205868086  | -1.516756238237 |
| H    | -3.081186535128 | 1.245423496139  | -0.888163736560 |
| C    | -4.573447854764 | -1.889474704587 | -2.943779628534 |
| H    | -4.495909289682 | -2.980089481245 | -2.899446768801 |
| H    | -5.631061367277 | -1.629300088978 | -2.837585759210 |
| H    | -4.244675004976 | -1.571186460962 | -3.938182380331 |
| C    | -4.679308466176 | -2.736973783197 | 2.403318596940  |
| H    | -4.353273417070 | -2.794185840342 | 3.446632772458  |

|    |                 |                 |                 |
|----|-----------------|-----------------|-----------------|
| H  | -5.710258613582 | -2.370028974978 | 2.390280439220  |
| H  | -4.685594413586 | -3.753589886840 | 1.998637325524  |
| C  | -3.555263553047 | 0.125881191954  | 2.072973153420  |
| H  | -4.530111314830 | 0.599348860619  | 1.922904358725  |
| H  | -3.331274088136 | 0.156179295653  | 3.143975419587  |
| H  | -2.804930879351 | 0.732200697509  | 1.558259466978  |
| Si | 1.310081078026  | 0.126410104918  | 0.151763180641  |
| C  | 3.100324158302  | -0.417660120453 | 0.031977874408  |
| N  | 1.641651892403  | 1.809172219949  | 0.138134703129  |
| C  | 3.897891357297  | 0.909483745679  | 0.216153373260  |
| Si | 3.438439523738  | -1.579456239798 | 1.500656079303  |
| Si | 3.371563601863  | -1.185522652847 | -1.689217318356 |
| C  | 0.679659349315  | 2.922465104946  | 0.163011079376  |
| C  | 3.041595642784  | 2.113909979366  | -0.185665853869 |
| H  | 4.182487086359  | 1.032854501481  | 1.267650372126  |
| H  | 4.838066375943  | 0.915332087520  | -0.346515111721 |
| C  | 2.614695744028  | -3.258347576566 | 1.309761900165  |
| C  | 2.780419602208  | -0.753858531606 | 3.068815540084  |
| C  | 5.295920601484  | -1.802404037234 | 1.725920733448  |
| C  | 2.323909294419  | -2.722775547359 | -1.988981758181 |
| C  | 5.182168684835  | -1.656124424116 | -1.927192884488 |
| C  | 2.954629653109  | 0.113208102237  | -2.998644848188 |
| C  | -0.719653354074 | 2.404121594993  | 0.524758700607  |
| C  | 1.075239024413  | 3.974273693468  | 1.219473363255  |
| C  | 0.600211858568  | 3.603128003601  | -1.216989634399 |
| H  | 3.382320750700  | 3.006358278123  | 0.345787524793  |
| H  | 3.141153011608  | 2.322804108728  | -1.257547023217 |
| H  | 1.602434908941  | -3.167676076876 | 0.907223918304  |
| H  | 2.546854263749  | -3.754687306407 | 2.283420334269  |
| H  | 3.180217011992  | -3.918046220118 | 0.646759073334  |
| H  | 1.695412435601  | -0.615123734442 | 3.040861943377  |
| H  | 3.005605329118  | -1.372844019536 | 3.943869493231  |
| H  | 3.231786265861  | 0.227630347038  | 3.242853851532  |
| H  | 5.504064868680  | -2.350462814596 | 2.650948239609  |
| H  | 5.749513328380  | -2.359982525821 | 0.903027632819  |
| H  | 5.812323768807  | -0.839960869430 | 1.794129731286  |
| H  | 1.344489088332  | -2.669168833124 | -1.507416683051 |
| H  | 2.821721198996  | -3.623820811897 | -1.622703500672 |
| H  | 2.160984281029  | -2.856021583618 | -3.063680447784 |
| H  | 5.438982323084  | -2.562830725626 | -1.372636243178 |
| H  | 5.869546498711  | -0.867121482807 | -1.608513263028 |
| H  | 5.380976250103  | -1.856114233808 | -2.985578505917 |
| H  | 1.977395524635  | 0.579667824894  | -2.838539526565 |
| H  | 2.940203299954  | -0.341729601135 | -3.994584368801 |
| H  | 3.702585861560  | 0.911567796323  | -3.019683104383 |
| C  | -1.743301418137 | 3.543001581759  | 0.550120407982  |
| H  | -0.682484000537 | 1.900746692887  | 1.498270666317  |
| H  | -1.029016145124 | 1.645691029159  | -0.200249204937 |
| C  | 0.058242388316  | 5.123895956795  | 1.242880553424  |
| H  | 1.136550544959  | 3.485522448954  | 2.198969940200  |
| H  | 2.066859041441  | 4.384324481385  | 1.001648246543  |
| C  | -0.417616708263 | 4.750852324521  | -1.192803907708 |
| H  | 0.321581331118  | 2.849891923027  | -1.964315933296 |
| H  | 1.584963077844  | 3.990359396706  | -1.502352843783 |
| C  | -1.329012094453 | 4.578872070064  | 1.599314178688  |
| C  | -1.802310967148 | 4.199792863221  | -0.833877070747 |
| H  | -2.725125133448 | 3.127595399060  | 0.804253303119  |
| C  | 0.009356090867  | 5.784720878373  | -0.141785083599 |
| H  | 0.371283786446  | 5.860927699051  | 1.991987571900  |
| H  | -0.450725098788 | 5.222152607037  | -2.182298026772 |
| H  | -1.311262443164 | 4.120018447315  | 2.595495241224  |
| H  | -2.059663487243 | 5.396086227873  | 1.637305500033  |
| H  | -2.544204036571 | 5.007572341486  | -0.837622402597 |
| H  | -2.125950793231 | 3.467882797091  | -1.583033155223 |
| H  | -0.695906162321 | 6.624548774333  | -0.132564033688 |
| H  | 0.992763449153  | 6.199386823254  | -0.397211300865 |

-----  
(frequency analysis in the gas phase)  
Thermochemistry at 298.150 K, 1.000 Atm  
E(el) = -2759.050158515584  
ZPVE = 0.775393237717  
Enthalpie(OK) = -2758.274765277867  
E(tr) = 0.001416284860  
E(rot) = 0.001416284860  
E(vib) = 0.818928139226  
H-E(el) = 0.822704898852  
Enthalpie = -2758.227453616732  
S(el) = 0.000000000000  
S(tr) = 0.000072830257

S(rot) = 0.000060232164 (Symmetry number = 1)  
S(vib) = 0.000284214955  
G-E(el) = 0.698293649210  
Free Energy = -2758.351864866373 (0.0 kJ/mol relative to **6a<sub>opt</sub>**)  
JOB name: ti510Dopt

**Table S3.** Atomic Coordinates of **6a<sub>opt</sub>** at the PBE0-D3/B Level of Theory  
(B: SDD [Pt], 6-311G(d) [H, C, N, O, Si])

| Atom | X               | Y               | Z               |
|------|-----------------|-----------------|-----------------|
| Pt   | -0.614272729658 | -1.099364982768 | -0.013460823463 |
| C    | -0.755759438248 | -1.586888455072 | 2.078145136074  |
| H    | 0.086980485567  | -2.173822811647 | 2.434718135301  |
| H    | -0.952243327970 | -0.696741660912 | 2.672830317649  |
| C    | -1.821207862318 | -2.228151231954 | 1.390901929270  |
| H    | -1.681866075391 | -3.287431782994 | 1.164995849387  |
| C    | -0.739590289863 | -0.761868331667 | -2.144137272285 |
| H    | 0.111366758215  | -1.147078945810 | -2.699941618553 |
| H    | -0.970253712837 | 0.278161794152  | -2.369369502890 |
| C    | -1.783546893495 | -1.644685667613 | -1.751303476247 |
| H    | -1.604734457815 | -2.706458159634 | -1.936180587237 |
| Si   | -3.574830748213 | -1.595534783677 | 1.409498744079  |
| Si   | -3.571229981564 | -1.128065812741 | -1.607382674621 |
| O    | -4.189759984485 | -1.587560130663 | -0.135321353057 |
| C    | -3.716620519332 | 0.734425511759  | -1.778299295124 |
| H    | -3.384896271626 | 1.084578745768  | -2.760992498240 |
| H    | -4.757388358053 | 1.047508170418  | -1.650950239084 |
| H    | -3.125179094088 | 1.254439220430  | -1.019399061957 |
| C    | -4.604670614873 | -1.988219370525 | -2.908313521644 |
| H    | -4.590217273018 | -3.075551698653 | -2.812386990907 |
| H    | -5.661939403493 | -1.723142717244 | -2.812550183271 |
| H    | -4.279590004979 | -1.719651056682 | -3.918333486558 |
| C    | -4.687207488992 | -2.718529429291 | 2.410289928094  |
| H    | -4.360748933457 | -2.776011480246 | 3.453335058653  |
| H    | -5.721918863012 | -2.362679642546 | 2.399580275813  |
| H    | -4.684641639072 | -3.734478707700 | 2.004106786717  |
| C    | -3.596750984059 | 0.150132157555  | 2.095211817671  |
| H    | -4.590217273018 | 0.595658732400  | 1.986223178729  |
| H    | -3.336288337150 | 0.178839625312  | 3.158035337216  |
| H    | -2.885413466713 | 0.786315669443  | 1.560214236679  |
| Si   | 1.291706880090  | 0.116169587215  | 0.096520818238  |
| C    | 3.090334130175  | -0.415861774516 | -0.011820749265 |
| N    | 1.621704876915  | 1.799249815776  | 0.068576576274  |
| C    | 3.876546636679  | 0.917738591865  | 0.149757960945  |
| Si   | 3.442532802647  | -1.533559626472 | 1.488817503706  |
| Si   | 3.388580025610  | -1.218889711184 | -1.711268644684 |
| C    | 0.679592792072  | 2.922110328223  | 0.144931019610  |
| C    | 3.013249349429  | 2.103100019815  | -0.275706592463 |
| H    | 4.156445823701  | 1.063903284557  | 1.200020948068  |
| H    | 4.818514095184  | 0.919092508623  | -0.410541623301 |
| C    | 2.644396323839  | -3.228075161285 | 1.346551581321  |
| C    | 2.768624094706  | -0.673459172428 | 3.029817990063  |
| C    | 5.300435149365  | -1.724670455467 | 1.727944428222  |
| C    | 2.357385360294  | -2.771366249777 | -1.976009457476 |
| C    | 5.204788850836  | -1.671936547777 | -1.926746693095 |
| C    | 2.964445244570  | 0.035401215965  | -3.058558363945 |
| C    | -0.734463275389 | 2.408646241976  | 0.433324662914  |
| C    | 1.065534666374  | 3.883895841954  | 1.283889136590  |
| C    | 0.650358726033  | 3.700735466632  | -1.180903585337 |
| H    | 3.352129506902  | 3.013214278912  | 0.227156401394  |
| H    | 3.101723394850  | 2.283116759867  | -1.354152987487 |
| H    | 1.626378949232  | -3.163420266160 | 0.952074928931  |
| H    | 2.592990877687  | -3.701542857941 | 2.332591137629  |
| H    | 3.212395820912  | -3.897353238481 | 0.695151442791  |
| H    | 1.680448031124  | -0.559213578792 | 3.00009800013   |
| H    | 3.007398746550  | -1.259063223843 | 3.924016422839  |
| H    | 3.197906294085  | 0.322719081595  | 3.173933050187  |
| H    | 5.508638854990  | -2.247018743020 | 2.667664031997  |
| H    | 5.768173396581  | -2.297400711031 | 0.923425552016  |
| H    | 5.806068329833  | -0.755371328296 | 1.777337521522  |
| H    | 1.368074248745  | -2.703439270049 | -1.515096877435 |
| H    | 2.849875503234  | -3.657075661493 | -1.567354200850 |
| H    | 2.215323757965  | -2.945658373047 | -3.047841718234 |
| H    | 5.478352782054  | -2.548288455295 | -1.332763705657 |
| H    | 5.880991521072  | -0.858632611334 | -1.647096747981 |

|   |                 |                 |                 |
|---|-----------------|-----------------|-----------------|
| H | 5.406322394770  | -1.916568288246 | -2.975114568119 |
| H | 1.966115017602  | 0.468496477884  | -2.937197219216 |
| H | 2.992849647061  | -0.443121969678 | -4.043179762168 |
| H | 3.682279694613  | 0.860921484655  | -3.082377249837 |
| C | -1.735693003499 | 3.562210477172  | 0.513542113236  |
| H | -0.731703223112 | 1.842007629561  | 1.372552628061  |
| H | -1.035250079164 | 1.704238254797  | -0.348726955454 |
| C | 0.073713442686  | 5.049246590441  | 1.363433923218  |
| H | 1.084288767833  | 3.323180535875  | 2.226101846853  |
| H | 2.073507687621  | 4.283009024539  | 1.127223588470  |
| C | -0.344140039590 | 4.862600454860  | -1.099292577075 |
| H | 0.377749200247  | 3.010957955486  | -1.989713846935 |
| H | 1.649506059313  | 4.088158517151  | -1.411882670194 |
| C | -1.330323495527 | 4.509829592292  | 1.642787693043  |
| C | -1.745624303916 | 4.316696971020  | -0.817451421852 |
| H | -2.732042121017 | 3.150785440942  | 0.713106815851  |
| C | 0.074005700837  | 5.806990184437  | 0.032009547518  |
| H | 0.379973222872  | 5.723869131616  | 2.171720393352  |
| H | -0.341483653240 | 5.404334647655  | -2.052539471549 |
| H | -1.348762019223 | 3.980440871191  | 2.603363312343  |
| H | -2.046205648857 | 5.337250588484  | 1.720462301496  |
| H | -2.471849842282 | 5.137833038297  | -0.781293959559 |
| H | -2.062607888825 | 3.647097395928  | -1.626378409248 |
| H | -0.614821778990 | 6.658825081078  | 0.084469692343  |
| H | 1.071688997042  | 6.217713140079  | -0.168681304833 |

(frequency analysis in the gas phase)

Thermochemistry at 298.150 K, 1.000 Atm  
E(el) = -2757.428705881179  
ZPVE = 0.777428787382  
Enthalpie (0K) = -2756.651277093797  
E(tr) = 0.001416284860  
E(rot) = 0.001416284860  
E(vib) = 0.821182786096  
H-E(el) = 0.824959545722  
Enthalpie = -2756.603746335457  
S(el) = 0.000000000000  
S(tr) = 0.000072830257  
S(rot) = 0.000060260974 (Symmetry number = 1)  
S(vib) = 0.000288849056  
G-E(el) = 0.699158049227  
Free Energy = -2756.729547831952  
JOB name: ti510Dopt2

**Table S4.** Atomic Coordinates of **6a<sub>opt</sub>** at the B3LYP-D3/B Level of Theory

(B: SDD [Pt], 6-311G(d) [H, C, N, O, Si])

| Atom | X               | Y               | Z               |
|------|-----------------|-----------------|-----------------|
| Pt   | -0.599794254203 | -1.109076907576 | -0.007822466935 |
| C    | -0.778531431424 | -1.566453404526 | 2.133202154359  |
| H    | 0.062588294164  | -2.150814193604 | 2.493984097377  |
| H    | -0.952810024220 | -0.656311895987 | 2.701291501184  |
| C    | -1.851345439768 | -2.206420521360 | 1.464082846487  |
| H    | -1.720934998161 | -3.269612071036 | 1.255662721830  |
| C    | -0.778370118692 | -0.880400176367 | -2.190529013709 |
| H    | 0.068649808547  | -1.299616639147 | -2.724648151779 |
| H    | -0.986366038926 | 0.153932021580  | -2.453030654403 |
| C    | -1.828527254558 | -1.725196766047 | -1.747977870981 |
| H    | -1.663433950689 | -2.796407682119 | -1.876992359023 |
| Si   | -3.611035933197 | -1.570039831199 | 1.458733029708  |
| Si   | -3.616858408320 | -1.189367483665 | -1.596748297208 |
| O    | -4.212243246777 | -1.596157682437 | -0.095214963591 |
| C    | -3.752514495011 | 0.673968831766  | -1.823795400647 |
| H    | -3.420444712510 | 0.993764967835  | -2.816305433457 |
| H    | -4.789846589277 | 0.999796928732  | -1.702853789095 |
| H    | -3.153732254121 | 1.209691381506  | -1.083258803045 |
| C    | -4.677069084909 | -2.091478026007 | -2.856535346368 |
| H    | -4.600298516693 | -3.175486181887 | -2.729721505086 |
| H    | -5.732244125603 | -1.822540742175 | -2.749741891369 |
| H    | -4.371480129176 | -1.854439696480 | -3.880360319340 |
| C    | -4.728863569241 | -2.679125666292 | 2.481007881252  |
| H    | -4.415621063119 | -2.705302172893 | 3.529290040074  |
| H    | -5.766244070907 | -2.332676281996 | 2.448436114938  |
| H    | -4.713678050384 | -3.706058510793 | 2.1040233265241 |
| C    | -3.643480019401 | 0.197203172185  | 2.104414689255  |

|    |                 |                 |                 |
|----|-----------------|-----------------|-----------------|
| H  | -4.647459504126 | 0.622944398036  | 2.017697060968  |
| H  | -3.349474686917 | 0.257272493795  | 3.156853669933  |
| H  | -2.963187480455 | 0.833364546674  | 1.532576682987  |
| Si | 1.302322694039  | 0.122694183433  | 0.081137072829  |
| C  | 3.110619252878  | -0.417667708483 | -0.014436747067 |
| N  | 1.627234621970  | 1.811349675095  | 0.041664384567  |
| C  | 3.901785401468  | 0.926401266014  | 0.161916694792  |
| Si | 3.469055272137  | -1.559243153851 | 1.479232729036  |
| Si | 3.422961475615  | -1.205882192654 | -1.730602414408 |
| C  | 0.680438624660  | 2.946267649152  | 0.125003132440  |
| C  | 3.038639020527  | 2.123445074095  | -0.264383026172 |
| H  | 4.175502973677  | 1.066485941725  | 1.212673574345  |
| H  | 4.846097679890  | 0.933941141694  | -0.391596006501 |
| C  | 2.635950589890  | -3.245862587699 | 1.344771713030  |
| C  | 2.838596387410  | -0.711513888265 | 3.054099733788  |
| C  | 5.333837610509  | -1.789233102115 | 1.685951912840  |
| C  | 2.442092520216  | -2.799072321750 | -1.996216930572 |
| C  | 5.257797318796  | -1.597371099484 | -1.970760345591 |
| C  | 2.941254380905  | 0.031330978556  | -3.084232596931 |
| C  | -0.765977642999 | 2.436153740196  | 0.288136050113  |
| C  | 1.006060601394  | 3.835987923263  | 1.351488037584  |
| C  | 0.742339801485  | 3.812053977641  | -1.156985664778 |
| H  | 3.362277336645  | 3.025017628416  | 0.261115001491  |
| H  | 3.150264850616  | 2.322277249180  | -1.335696132330 |
| H  | 1.612919818110  | -3.164748979643 | 0.970488431307  |
| H  | 2.594744400251  | -3.719247213845 | 2.331068649074  |
| H  | 3.178827766592  | -3.924292773464 | 0.682838064515  |
| H  | 1.751910486277  | -0.590812139990 | 3.056775062257  |
| H  | 3.097988485115  | -1.313994979487 | 3.930836652729  |
| H  | 3.277976575864  | 0.278620669542  | 3.204574932952  |
| H  | 5.551171935978  | -2.295981455382 | 2.631858067103  |
| H  | 5.771622418259  | -2.389693180769 | 0.885443428928  |
| H  | 5.862116901974  | -0.831359781587 | 1.702297100338  |
| H  | 1.456260271586  | -2.770687576166 | -1.528313314230 |
| H  | 2.969531419321  | -3.668732786143 | -1.598028422209 |
| H  | 2.297969625362  | -2.971716792511 | -3.067664475532 |
| H  | 5.572232694459  | -2.459860195281 | -1.378081330579 |
| H  | 5.909732360537  | -0.760674184323 | -1.704914636037 |
| H  | 5.452113695122  | -1.838910286035 | -3.021009382050 |
| H  | 1.915297350795  | 0.397076565083  | -2.982290759513 |
| H  | 3.019386781426  | -0.441596413288 | -4.068556184086 |
| H  | 3.602548486937  | 0.902217183659  | -3.093536713978 |
| C  | -1.761174751457 | 3.605808211605  | 0.383190993497  |
| H  | -0.837568555775 | 1.811451236293  | 1.183334782895  |
| C  | -1.026066394013 | 1.796438026906  | -0.557770680702 |
| C  | 0.020182501031  | 5.017585226936  | 1.442373014552  |
| H  | 0.956076944159  | 3.219218369362  | 2.255398362224  |
| H  | 2.027659950697  | 4.222265713845  | 1.284337960784  |
| C  | -0.248371867959 | 4.988946226513  | -1.063572347472 |
| H  | 0.514746141246  | 3.180270705824  | -2.023266005990 |
| H  | 1.754778943114  | 4.201628540878  | -1.302300468011 |
| C  | -1.413033609735 | 4.479081596483  | 1.600695999685  |
| C  | -1.680285975814 | 4.447506133404  | -0.902353943548 |
| H  | -2.771524694193 | 3.198224795253  | 0.495943938400  |
| C  | 0.112347895455  | 5.860734727741  | 0.155366323546  |
| H  | 0.282060543779  | 5.636235668009  | 2.308052255323  |
| H  | -0.178911845740 | 5.587784243845  | -1.978579933333 |
| H  | -1.496885459603 | 3.890808604262  | 2.521825257033  |
| H  | -2.122993346379 | 5.309668271201  | 1.687575747276  |
| H  | -2.395983203980 | 5.276476733810  | -0.858683121277 |
| H  | -1.954798156702 | 3.835622896952  | -1.769371644052 |
| H  | -0.567623315289 | 6.717947377281  | 0.218478245374  |
| H  | 1.124583359548  | 6.267116430550  | 0.041900430712  |

-----  
(frequency analysis in the gas phase)

Thermochemistry at 298.150 K, 1.000 Atm

E(el) = -2759.658192670863  
ZPVE = 0.773679719782  
Enthalpie (OK) = -2758.884512951081  
E(tr) = 0.001416284860  
E(rot) = 0.001416284860  
E(vib) = 0.817755789707  
H-E(el) = 0.821532549333  
Enthalpie = -2758.836660121530  
S(el) = 0.000000000000  
S(tr) = 0.000072830257  
S(rot) = 0.000060345008 (Symmetry number = 1)  
S(vib) = 0.000293819530  
G-E(el) = 0.694224051384

Free Energy = -2758.963968619480  
JOB name: ti510Dopt3

**Table S5.** Atomic Coordinates of **6a<sub>opt</sub>** at the M06-2X/B Level of Theory

(B: SDD [Pt], 6-311G(d) [H, C, N, O, Si])

| Atom | X               | Y               | Z               |
|------|-----------------|-----------------|-----------------|
| Pt   | -0.597987834509 | -1.110494976297 | 0.007798314090  |
| C    | -0.755164724763 | -1.638212221715 | 2.094656198700  |
| H    | 0.090519133301  | -2.229406141411 | 2.433122111916  |
| H    | -0.942873532840 | -0.750558433352 | 2.693510141180  |
| C    | -1.821221728704 | -2.264193386404 | 1.401718725254  |
| H    | -1.682750762232 | -3.316701766464 | 1.155421257993  |
| C    | -0.720950169704 | -0.734419778420 | -2.124265436192 |
| H    | 0.138411213261  | -1.106139702180 | -2.674285253607 |
| H    | -0.947315000350 | 0.311845655510  | -2.318670354290 |
| C    | -1.764847961952 | -1.623922336333 | -1.760359351765 |
| H    | -1.579454950756 | -2.679805672426 | -1.959692165172 |
| Si   | -3.564768713658 | -1.607053974142 | 1.407382187692  |
| Si   | -3.549912359981 | -1.105866713160 | -1.600897210326 |
| O    | -4.165148007883 | -1.607605111173 | -0.142538516639 |
| C    | -3.684800525711 | 0.763393250190  | -1.703430527354 |
| H    | -3.322016860359 | 1.151843087235  | -2.659321366059 |
| H    | -4.729147254932 | 1.069831039715  | -1.598492436367 |
| H    | -3.121919939749 | 1.254623389870  | -0.904619223028 |
| C    | -4.588749371877 | -1.907907239812 | -2.931369368339 |
| H    | -4.519259911321 | -2.997118658389 | -2.877453727441 |
| H    | -5.642434648946 | -1.639539447815 | -2.822495559597 |
| H    | -4.263278349230 | -1.602244061288 | -3.929021260731 |
| C    | -4.703704573590 | -2.687122502450 | 2.421354092993  |
| H    | -4.381176348824 | -2.736772792009 | 3.464409142342  |
| H    | -5.727898304094 | -2.306534101329 | 2.401561819341  |
| H    | -4.723656705370 | -3.706920943927 | 2.029424225332  |
| C    | -3.552655522215 | 0.152458121572  | 2.060308272953  |
| H    | -4.528837778582 | 0.622820450547  | 1.914190409919  |
| H    | -3.321122682470 | 0.194975022655  | 3.128250310240  |
| H    | -2.808974062786 | 0.758693829444  | 1.534068322951  |
| Si   | 1.278905904929  | 0.103768027205  | 0.120284972176  |
| C    | 3.079782872187  | -0.423453280985 | 0.001486342513  |
| N    | 1.603287266886  | 1.788250069446  | 0.076069156874  |
| C    | 3.868903956403  | 0.916666126634  | 0.141097598132  |
| Si   | 3.468652463925  | -1.538112210947 | 1.487735463975  |
| Si   | 3.376197049386  | -1.235288121067 | -1.688430821445 |
| C    | 0.656039363601  | 2.915753133119  | 0.143180282552  |
| C    | 2.994391022990  | 2.098125364953  | -0.291686147401 |
| H    | 4.154107474290  | 1.079639265176  | 1.186295100896  |
| H    | 4.803974251908  | 0.914100199421  | -0.429411528974 |
| C    | 2.724444565243  | -3.254929896827 | 1.312560595103  |
| C    | 2.772476922058  | -0.717769148944 | 3.039723692407  |
| C    | 5.331882466740  | -1.675248637943 | 1.720946897603  |
| C    | 2.311273243391  | -2.764927208931 | -1.975653247821 |
| C    | 5.180094229499  | -1.746080354634 | -1.878674341636 |
| C    | 3.001444431994  | 0.042524676276  | -3.029120265890 |
| C    | -0.760636002008 | 2.400443867445  | 0.441626959423  |
| C    | 1.044108768460  | 3.894282411664  | 1.272059315466  |
| C    | 0.624303156388  | 3.679070794208  | -1.195372387721 |
| H    | 3.333794999415  | 3.013493027912  | 0.197226813338  |
| H    | 3.067035273479  | 2.262006099400  | -1.372340559563 |
| H    | 1.700903890297  | -3.219674032785 | 0.928845915337  |
| H    | 2.700605385104  | -3.754215540465 | 2.285659702232  |
| H    | 3.310728892573  | -3.885476704157 | 0.639644530527  |
| H    | 1.681764212213  | -0.637327499900 | 3.016346070551  |
| H    | 3.035115927803  | -1.299433376226 | 3.928253742307  |
| H    | 3.171165168235  | 0.290025465864  | 3.186409221771  |
| H    | 5.556172762558  | -2.203249761784 | 2.652459284528  |
| H    | 5.816172243538  | -2.221820239109 | 0.909527758773  |
| H    | 5.806136875965  | -0.692026130715 | 1.784622162695  |
| H    | 1.340244919848  | -2.713182211215 | -1.477521735923 |
| H    | 2.812158971065  | -3.669899580228 | -1.625347156786 |
| H    | 2.128744065708  | -2.892865331058 | -3.047052555910 |
| H    | 5.399067127763  | -2.658664266455 | -1.318593227422 |
| H    | 5.878626207615  | -0.975088927393 | -1.543270726863 |
| H    | 5.400584317903  | -1.953170995561 | -2.930076681848 |
| H    | 2.032729663876  | 0.533594268647  | -2.887256982376 |
| H    | 2.985661704524  | -0.430898045594 | -4.015079570661 |

|   |                 |                |                 |
|---|-----------------|----------------|-----------------|
| H | 3.766249508944  | 0.823603233088 | -3.059744724746 |
| C | -1.767787120689 | 3.555010011676 | 0.511292118955  |
| H | -0.751810833858 | 1.845382001883 | 1.387428922166  |
| H | -1.061559495270 | 1.693163393802 | -0.336056917502 |
| C | 0.045284830063  | 5.060970828251 | 1.339649265188  |
| H | 1.064782925731  | 3.345210114438 | 2.219945181066  |
| H | 2.047300712819  | 4.297411006125 | 1.106720947047  |
| C | -0.378754223912 | 4.840653531036 | -1.127224186606 |
| H | 0.354220593189  | 2.978069886983 | -1.994777331640 |
| H | 1.620585299315  | 4.070282302315 | -1.427866221586 |
| C | -1.360856588751 | 4.520979294619 | 1.630298103439  |
| C | -1.782116708072 | 4.292455692480 | -0.834360013249 |
| H | -2.761805712567 | 3.144721231081 | 0.718125361837  |
| C | 0.039339765992  | 5.803649371671 | -0.005430675077 |
| H | 0.351139194394  | 5.745939774088 | 2.136380753740  |
| H | -0.380204727190 | 5.369406644161 | -2.085241376295 |
| H | -1.374792670829 | 4.003537395242 | 2.595720008530  |
| H | -2.076575176647 | 5.347486442224 | 1.695700396955  |
| H | -2.508513113282 | 5.111701784600 | -0.807368615465 |
| H | -2.096005804545 | 3.608768494558 | -1.631279371377 |
| H | -0.654127550028 | 6.650219980196 | 0.038421735899  |
| H | 1.034125118266  | 6.213434404788 | -0.213410778217 |

(frequency analysis in the gas phase)

Thermochemistry at 298.150 K, 1.000 Atm

E(el) = -2758.680224191076

ZPVE = 0.780777416354

Enthalpie(0K) = -2757.899446774722

E(tr) = 0.001416284860

E(rot) = 0.001416284860

E(vib) = 0.824160362899

H-E(el) = 0.827937122525

Enthalpie = -2757.852287068551

S(el) = 0.000000000000

S(tr) = 0.000072830257

S(rot) = 0.000060248770 (Symmetry number = 1)

S(vib) = 0.000284692814

G-E(el) = 0.703378448115

Free Energy = -2757.976845742960

JOB name: ti510Dopt4

**Table S6.** Atomic Coordinates of **6b<sub>opt</sub>** at the B3PW91-D3/B Level of Theory

(B: SDD [Pt], 6-311G(d) [H, C, N, O, Si])

| Atom | X               | Y               | Z               |
|------|-----------------|-----------------|-----------------|
| Pt   | -0.865881083332 | -0.554073587735 | -0.320628682482 |
| Si   | 0.885431967147  | 0.850587053571  | -0.068504216524 |
| N    | 2.575270095114  | 0.547197522766  | -0.140378446850 |
| C    | 3.365112151543  | 1.583568218501  | 0.539053749942  |
| C    | 2.570693835588  | 2.890792116499  | 0.501505542713  |
| C    | 1.040278660685  | 2.606028411086  | 0.571177292533  |
| C    | -0.443014225581 | -1.466200500146 | 1.607375625243  |
| C    | -1.450356315415 | -2.225524132320 | 0.951222729529  |
| C    | -1.546161081832 | 0.103655979164  | -2.265507199037 |
| C    | -2.337452134160 | -1.007193762463 | -1.868198369159 |
| H    | 0.569195388039  | -1.860024344446 | 1.680244542514  |
| H    | -0.712019843153 | -0.810221294632 | 2.432463901569  |
| H    | -1.102544585596 | -3.121767904758 | 0.430386889401  |
| H    | -0.786718058282 | -0.022023711616 | -3.035216023065 |
| H    | -1.955721555304 | 1.110267816044  | -2.219219081837 |
| H    | -2.061334387613 | -1.973067029106 | -2.297977820446 |
| Si   | -3.256207399165 | -2.260472307908 | 1.431319334212  |
| Si   | -4.065959796296 | -0.893997529920 | -1.175492038667 |
| O    | -4.209858288690 | -1.949091037997 | 0.104610163628  |
| C    | -4.407021328957 | 0.850637545254  | -0.580738841435 |
| H    | -4.338672268483 | 1.587206820932  | -1.387112663450 |
| H    | -5.410394766037 | 0.921302395587  | -0.149617278767 |
| H    | -3.692739548129 | 1.140961538909  | 0.194356579868  |
| C    | -5.335671106529 | -1.429137010359 | -2.443922323074 |
| H    | -5.139898217181 | -2.449464864650 | -2.787317814751 |
| H    | -6.345880299711 | -1.409878640306 | -2.023452422604 |
| H    | -5.321285273260 | -0.773138789023 | -3.320159200895 |
| C    | -3.713613200714 | -3.978568901942 | 2.021052694257  |
| H    | -3.147377923301 | -4.257479137121 | 2.915459693427  |
| H    | -4.779073119905 | -4.040490612135 | 2.262995048350  |

|    |                  |                 |                 |
|----|------------------|-----------------|-----------------|
| H  | -3.507387271628  | -4.725511018419 | 1.248270230411  |
| C  | -3.613032817171  | -0.990923221746 | 2.762042818590  |
| H  | -4.669703679995  | -1.027851166355 | 3.044423967586  |
| H  | -3.020836488342  | -1.170259643290 | 3.665006982732  |
| H  | -3.400435822786  | 0.024102104791  | 2.420063919094  |
| Si | 0.136359782353   | 3.748299487398  | -0.653054862316 |
| Si | 0.370993418471   | 2.632522218663  | 2.352443888119  |
| H  | 2.814561495738   | 3.405751487831  | -0.435396039274 |
| H  | 2.909353258811   | 3.558812773007  | 1.301557073585  |
| H  | 4.332163571111   | 1.725476509870  | 0.050549790394  |
| H  | 3.570617586579   | 1.281278310853  | 1.573107366404  |
| C  | 1.415180021258   | 1.458306754958  | 3.401627859232  |
| H  | 2.437381992021   | 1.826932016792  | 3.528519496116  |
| H  | 0.981421012698   | 1.355425022941  | 4.401815437563  |
| H  | 1.474429794348   | 0.454584975595  | 2.967858656252  |
| C  | 0.522907463166   | 4.358031800080  | 3.095433948757  |
| H  | -0.223553174999  | 5.040589217028  | 2.679552564564  |
| H  | 0.359946189134   | 4.318912636150  | 4.177713626376  |
| H  | 1.508773069756   | 4.801631848117  | 2.927457646062  |
| C  | -1.424733837984  | 2.078543545016  | 2.446392227039  |
| H  | -2.123102059699  | 2.899181865027  | 2.269315003490  |
| H  | -1.6314210126053 | 1.297669007181  | 1.711220895832  |
| H  | -1.642418167093  | 1.668924955233  | 3.437615443085  |
| C  | 0.681945462081   | 5.531300940846  | -0.381409415974 |
| H  | 0.234532827686   | 6.183282730172  | -1.139162956491 |
| H  | 0.381182037012   | 5.909570118467  | 0.598615890301  |
| H  | 1.767818512914   | 5.642289138538  | -0.457078104629 |
| C  | -1.731307862661  | 3.622702698055  | -0.524154963744 |
| H  | -2.046814119277  | 2.581549129454  | -0.434957102552 |
| H  | -2.130390800924  | 4.167487729394  | 0.335111206037  |
| H  | -2.200458637983  | 4.038121789741  | -1.421891197686 |
| C  | 0.640104055992   | 3.248004436558  | -2.403880592792 |
| H  | 0.224749172280   | 2.273063015428  | -2.677608516813 |
| H  | 0.266442659979   | 3.976003941035  | -3.131736412887 |
| H  | 1.725637500787   | 3.189829348773  | -2.529598348974 |
| C  | 3.262699594411   | -0.698192128195 | -0.523591057105 |
| C  | 4.458201930342   | -0.408955364289 | -1.455412125933 |
| C  | 3.776940103955   | -1.440175454923 | 0.725443859355  |
| C  | 2.301788975815   | -1.628567703754 | -1.280072967907 |
| C  | 5.164170882273   | -1.712990380676 | -1.853199443807 |
| H  | 5.184344613528   | 0.243029298823  | -0.959614536672 |
| H  | 4.096084315541   | 0.126455176798  | -2.341078491933 |
| C  | 4.477123351718   | -2.745862585866 | 0.327418634206  |
| H  | 4.474693105548   | -0.802104914057 | 1.279703597339  |
| H  | 2.928811720076   | -1.640196388078 | 1.390781498503  |
| C  | 2.996804163453   | -2.933523524110 | -1.681559273972 |
| H  | 1.914423931072   | -1.110958766559 | -2.166103282844 |
| H  | 1.432108918194   | -1.858410498475 | -0.656933699834 |
| C  | 5.665617501999   | -2.423902664418 | -0.588457865929 |
| C  | 4.184345221535   | -2.624942332670 | -2.597946018873 |
| H  | 6.014713863689   | -1.472597359617 | -2.502165404098 |
| C  | 3.488808117050   | -3.650488690745 | -0.418165777183 |
| H  | 4.834150803711   | -3.252482357232 | 1.231943425671  |
| H  | 2.273779594474   | -3.567157249041 | -2.208107743585 |
| H  | 6.388647347142   | -1.789894301577 | -0.059873642119 |
| H  | 6.192478345000   | -3.346636410020 | -0.860148968132 |
| H  | 4.684560723601   | -3.553013816818 | -2.900987048130 |
| H  | 3.835526438990   | -2.135815054937 | -3.515750864011 |
| H  | 3.970957223614   | -4.599254262073 | -0.683644049263 |
| H  | 2.638173489102   | -3.895514870810 | 0.229856387532  |

-----  
(frequency analysis in the gas phase)

Thermochemistry at 298.150 K, 1.000 Atm

E(el) = -2759.046678648038

ZPVE = 0.774710589096

Enthalpie(OK) = -2758.271968058942

E(tr) = 0.001416284860

E(rot) = 0.001416284860

E(vib) = 0.818509774376

H-E(el) = 0.822286534002

Enthalpie = -2758.224392114036

S(el) = 0.000000000000

S(tr) = 0.000072830257

S(rot) = 0.000060329794 (Symmetry number = 1)

S(vib) = 0.000288910932

G-E(el) = 0.696446070280

Free Energy = -2758.350232577758 (4.3 kJ/mol relative to **6a<sub>opt</sub>**)

JOB name: ti511\_forward\_end



**Table S7.** Atomic Coordinates of Transition State between **6a<sub>opt</sub>** and **6b<sub>opt</sub>** via Rotation of Pt-Si Bond (**TS<sub>opt</sub>** (**6a-6b**)) at the B3PW91-D3/B Level of Theory (B: SDD [Pt], 6-311G(d) [H, C, N, O, Si])

| Atom | X               | Y               | Z               |
|------|-----------------|-----------------|-----------------|
| Pt   | -1.015651590120 | -0.448600869556 | -0.731018097099 |
| Si   | 0.848786427208  | 0.834510375132  | -0.328850899443 |
| N    | 2.548089533979  | 0.538150764194  | -0.129641396590 |
| C    | 3.346709228280  | 1.730057457485  | 0.172571516885  |
| C    | 2.525118747471  | 2.960010270044  | -0.182534892751 |
| C    | 1.007052809884  | 2.696749563118  | 0.052180701414  |
| C    | -0.217226147133 | -2.464649888913 | -0.967754519192 |
| C    | -1.623902953821 | -2.553112485717 | -0.953414429706 |
| C    | -2.379881785043 | 1.243852798872  | -0.817588243399 |
| C    | -3.138869798013 | 0.062965931571  | -0.980471872586 |
| H    | 0.320825594691  | -2.580856545871 | -1.905786067732 |
| H    | 0.345817375743  | -2.772984068813 | -0.094570530366 |
| H    | -2.124970504955 | -2.646835820180 | -1.918880856052 |
| H    | -2.176979596808 | 1.874190386171  | -1.677099610562 |
| H    | -2.425077356700 | 1.778713081261  | 0.122934975754  |
| H    | -3.377523714058 | -0.214783230546 | -2.010415340797 |
| Si   | -2.583612544392 | -3.090006116822 | 0.556214560347  |
| Si   | -4.319015398393 | -0.608445416051 | 0.311024968920  |
| O    | -3.993592753607 | -2.211638133658 | 0.615630198141  |
| C    | -4.172519993525 | 0.344757452101  | 1.914814747333  |
| H    | -4.379798133307 | 1.411111639330  | 1.784500846936  |
| H    | -4.885744556160 | -0.046017472385 | 2.647162150841  |
| H    | -3.173462819588 | 0.248623518248  | 2.345264776875  |
| C    | -6.067423193943 | -0.524023033577 | -0.353943252606 |
| H    | -6.159697437679 | -1.084028970380 | -1.289572253753 |
| H    | -6.778917713553 | -0.952355203670 | 0.358714674470  |
| H    | -6.369112826641 | 0.509447208873  | -0.551970578226 |
| C    | -3.073412020368 | -4.893503694456 | 0.450096009087  |
| H    | -2.192309747093 | -5.541436150983 | 0.405038807463  |
| H    | -3.667557948998 | -5.191614479302 | 1.319562036313  |
| H    | -3.675318612114 | -5.084372262805 | -0.443337640438 |
| C    | -1.549281448427 | -2.762331770375 | 2.086733850113  |
| H    | -2.120302544450 | -2.968347204242 | 2.997221224690  |
| H    | -0.648014483927 | -3.383556222819 | 2.113460177030  |
| H    | -1.229602392869 | -1.716002399062 | 2.113902147528  |
| Si   | 0.098151567953  | 3.863393941534  | -1.160716356943 |
| Si   | 0.555656976152  | 3.001548132186  | 1.886223423799  |
| H    | 2.702033046599  | 3.174274708883  | -1.243925584963 |
| H    | 2.895533254720  | 3.836255038798  | 0.362686853793  |
| H    | 4.268871195977  | 1.738849976109  | -0.412901270869 |
| H    | 3.639898026091  | 1.734697953570  | 1.226863695316  |
| C    | 1.863640870567  | 2.278785689045  | 3.041120801191  |
| H    | 2.822526529669  | 2.799808311909  | 2.976219566378  |
| H    | 1.514111224539  | 2.374829580709  | 4.074721524770  |
| H    | 2.036834237391  | 1.214847452510  | 2.853215127891  |
| C    | 0.472216958971  | 4.848804117734  | 2.252798961762  |
| H    | -0.329381480243 | 5.352249343748  | 1.706674147285  |
| H    | 0.288591182213  | 5.002972978556  | 3.321486800007  |
| H    | 1.412713189565  | 5.352503972084  | 2.009695959089  |
| C    | -1.058738054742 | 2.182142555772  | 2.396498524733  |
| H    | -1.949678441413 | 2.686187318609  | 2.018031367534  |
| H    | -1.102053927947 | 1.142099773950  | 2.060445235592  |
| H    | -1.132967969285 | 2.180472840504  | 3.488947571659  |
| C    | 1.072091356394  | 5.477815485752  | -1.308840215166 |
| H    | 0.527942645139  | 6.156193992348  | -1.975466661821 |
| H    | 1.171008802676  | 5.983614664159  | -0.344410954916 |
| H    | 2.074406438242  | 5.351657108000  | -1.725318867480 |
| C    | -1.647240327555 | 4.410382664878  | -0.666941480232 |
| H    | -2.356679980237 | 4.256294752675  | -1.484473715973 |
| H    | -2.052225302626 | 3.900904690082  | 0.206517326268  |
| H    | -1.639547905224 | 5.481379029952  | -0.442899993034 |
| C    | 0.111593874148  | 3.070848615012  | -2.873839338566 |
| H    | -0.400728814857 | 2.105294791605  | -2.903849188479 |
| H    | -0.362427358358 | 3.728038728166  | -3.610550462760 |
| H    | 1.140471478059  | 2.901433361566  | -3.210235699166 |
| C    | 3.239259042713  | -0.776968562592 | -0.062264843718 |
| C    | 4.755077902418  | -0.644718217273 | 0.202832940527  |
| C    | 2.643739378883  | -1.615017471287 | 1.084611675508  |
| C    | 3.074147273457  | -1.521676308015 | -1.396317190510 |
| C    | 5.416330543540  | -2.029110148265 | 0.274327056144  |

|   |                |                 |                 |
|---|----------------|-----------------|-----------------|
| H | 4.936888281319 | -0.110169752368 | 1.141070183760  |
| H | 5.232533265688 | -0.071212636980 | -0.598644007002 |
| C | 3.288547064526 | -3.006153721096 | 1.140830094092  |
| H | 2.807336852854 | -1.081773596079 | 2.029796477208  |
| H | 1.561786312249 | -1.685777263286 | 0.952403252199  |
| C | 3.721991776451 | -2.911725844135 | -1.331933201561 |
| H | 3.534251205584 | -0.919995535323 | -2.190029040320 |
| H | 2.013242795291 | -1.593379525955 | -1.634436763833 |
| C | 4.789182630544 | -2.846860760227 | 1.409125938370  |
| C | 5.222532687733 | -2.755924447298 | -1.061418829597 |
| H | 6.486941472427 | -1.891082346351 | 0.467606357523  |
| C | 3.094712142957 | -3.733450237296 | -0.197518282156 |
| H | 2.824406346523 | -3.585819600084 | 1.947653756434  |
| H | 3.566749183273 | -3.425181372543 | -2.288172122081 |
| H | 4.951756487129 | -2.344783549016 | 2.371078879011  |
| H | 5.271553824683 | -3.829547269545 | 1.477195447363  |
| H | 5.708903587026 | -3.738577619457 | -1.031423134962 |
| H | 5.698372462270 | -2.189419094232 | -1.871656104223 |
| H | 3.567272018980 | -4.722525990837 | -0.151601515335 |
| H | 2.033591467333 | -3.906203707084 | -0.394721008386 |

(frequency analysis in the gas phase)

Thermochemistry at 298.150 K, 1.000 Atm

E(el) = -2759.024200634169

ZPVE = 0.776461496466

Enthalpie(0K) = -2758.247739137704

E(tr) = 0.001416284860

E(rot) = 0.001416284860

E(vib) = 0.818828999280

H-E(el) = 0.822605758906

Enthalpie = -2758.201594875263

S(el) = 0.000000000000

S(tr) = 0.000072830257

S(rot) = 0.000060411845 (Symmetry number = 1)

S(vib) = 0.000269963476

G-E(el) = 0.702390015587

Free Energy = -2758.321810618582 (78.9 kJ/mol relative to **6a<sub>opt</sub>**)

JOB name: ti511

**Table S8.** Transition Energies, Wavelengths, and Oscillator Strengths of the Electronic Transitions of **6<sub>opt</sub>** Calculated at the TD-B3PW91-D3/B1 level (Basis B1: SDD for Pt atom and 6-311G(d) for H, C, N, O, Si atoms) Level of Theory

|                  |           |                  |                  |           |          |
|------------------|-----------|------------------|------------------|-----------|----------|
| Excited State 1: | Singlet-A | Excited State 5: | Singlet-A        |           |          |
| 3.9397 eV        | 314.70 nm | f=0.0213         | 4.9592 eV        | 250.01 nm | f=0.1196 |
| 160 ->161        | 0.69920   | 156 ->161        | 0.35969          |           |          |
| Excited State 2: | Singlet-A | 157 ->161        | -0.18646         |           |          |
| 4.3177 eV        | 287.16 nm | f=0.0029         | 158 ->161        | 0.55142   |          |
| 159 ->161        | 0.70125   |                  |                  |           |          |
| Excited State 3: | Singlet-A |                  |                  |           |          |
| 4.7431 eV        | 261.40 nm | f=0.0008         |                  |           |          |
| 156 ->161        | 0.26898   | Excited State 6: | Singlet-A        |           |          |
| 157 ->161        | 0.64377   | 5.1277 eV        | 241.79 nm        | f=0.0100  |          |
| Excited State 4: | Singlet-A | 160 ->162        | 0.69338          |           |          |
| 4.7697 eV        | 259.94 nm | f=0.0145         | Excited State 7: | Singlet-A |          |
| 156 ->161        | 0.53261   | 5.1526 eV        | 240.62 nm        | f=0.0541  |          |
| 157 ->161        | -0.19317  | 158 ->161        | -0.11626         |           |          |
| 158 ->161        | -0.40467  | 160 ->163        | 0.41907          |           |          |

|                     |           |                     |           |
|---------------------|-----------|---------------------|-----------|
| 160 ->164           | 0.52577   |                     |           |
| Excited State 8:    | Singlet-A | Excited State 10:   | Singlet-A |
| 5.2777 eV 234.92 nm | f=0.0228  | 5.4583 eV 227.15 nm | f=0.0260  |
| 159 ->163           | 0.55483   | 155 ->161           | 0.63744   |
| 159 ->164           | -0.29559  | 159 ->162           | 0.10164   |
| 160 ->163           | 0.22967   | 160 ->165           | -0.16411  |
| 160 ->164           | -0.17701  | 160 ->166           | 0.16101   |
| Excited State 9:    | Singlet-A | Excited State 11:   | Singlet-A |
| 5.3889 eV 230.07 nm | f=0.1611  | 5.5795 eV 222.22 nm | f=0.0220  |
| 157 ->163           | -0.12544  | 159 ->162           | 0.50946   |
| 159 ->163           | -0.23697  | 159 ->163           | 0.20882   |
| 159 ->164           | 0.15874   | 159 ->164           | 0.20434   |
| 160 ->163           | 0.45647   | 159 ->165           | -0.28597  |
| 160 ->164           | -0.38091  | 159 ->166           | 0.1392    |

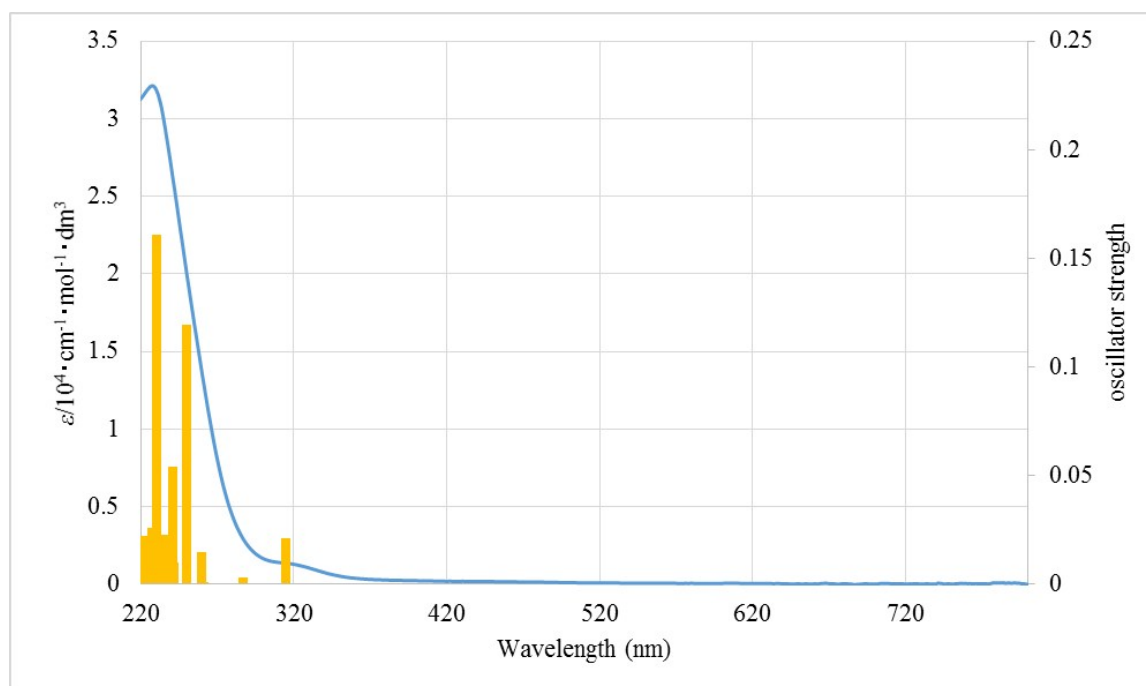

**Figure S31.** UV-vis absorption of **6** in hexane at room temperature. Superimposed vertical orange-yellow bars indicate band positions and oscillator strengths of **6a<sub>opt</sub>** at the B3PW91-D3/B level (Basis B: SDD for Pt atom and 6-311G(d) for Si, C, O, H atoms).

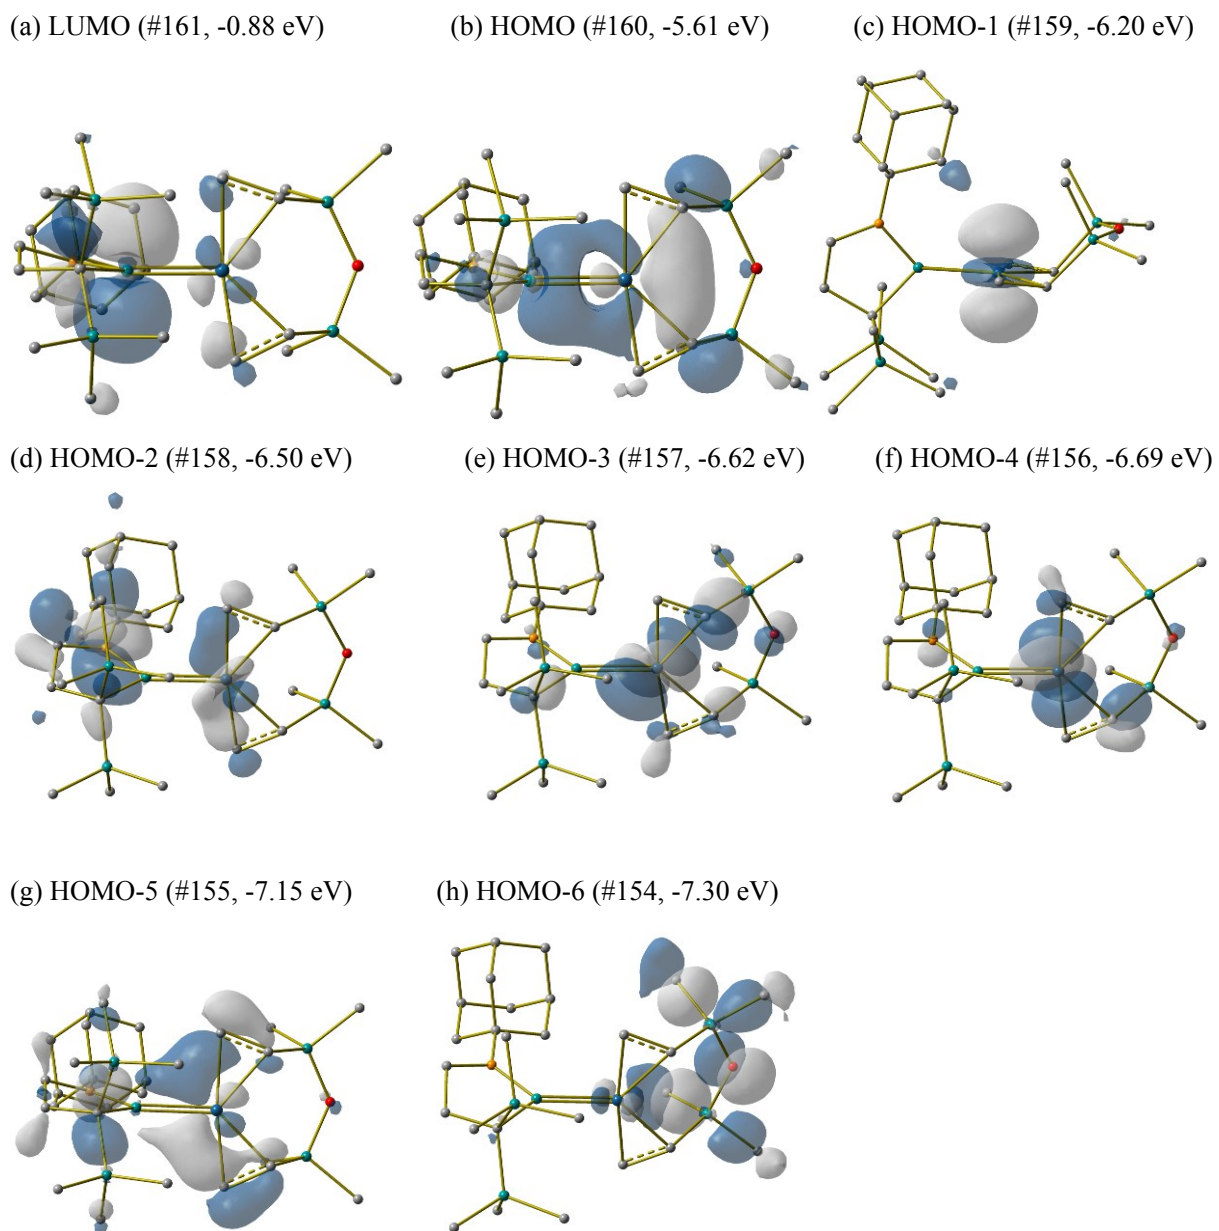

**Figure S32.** Frontier Kohn-Sham orbitals of **6a<sub>opt</sub>** at the B3PW91-D3/B level (Basis B: SDD for Pt atom and 6-311G(d) for H, C, N, O and Si atoms).

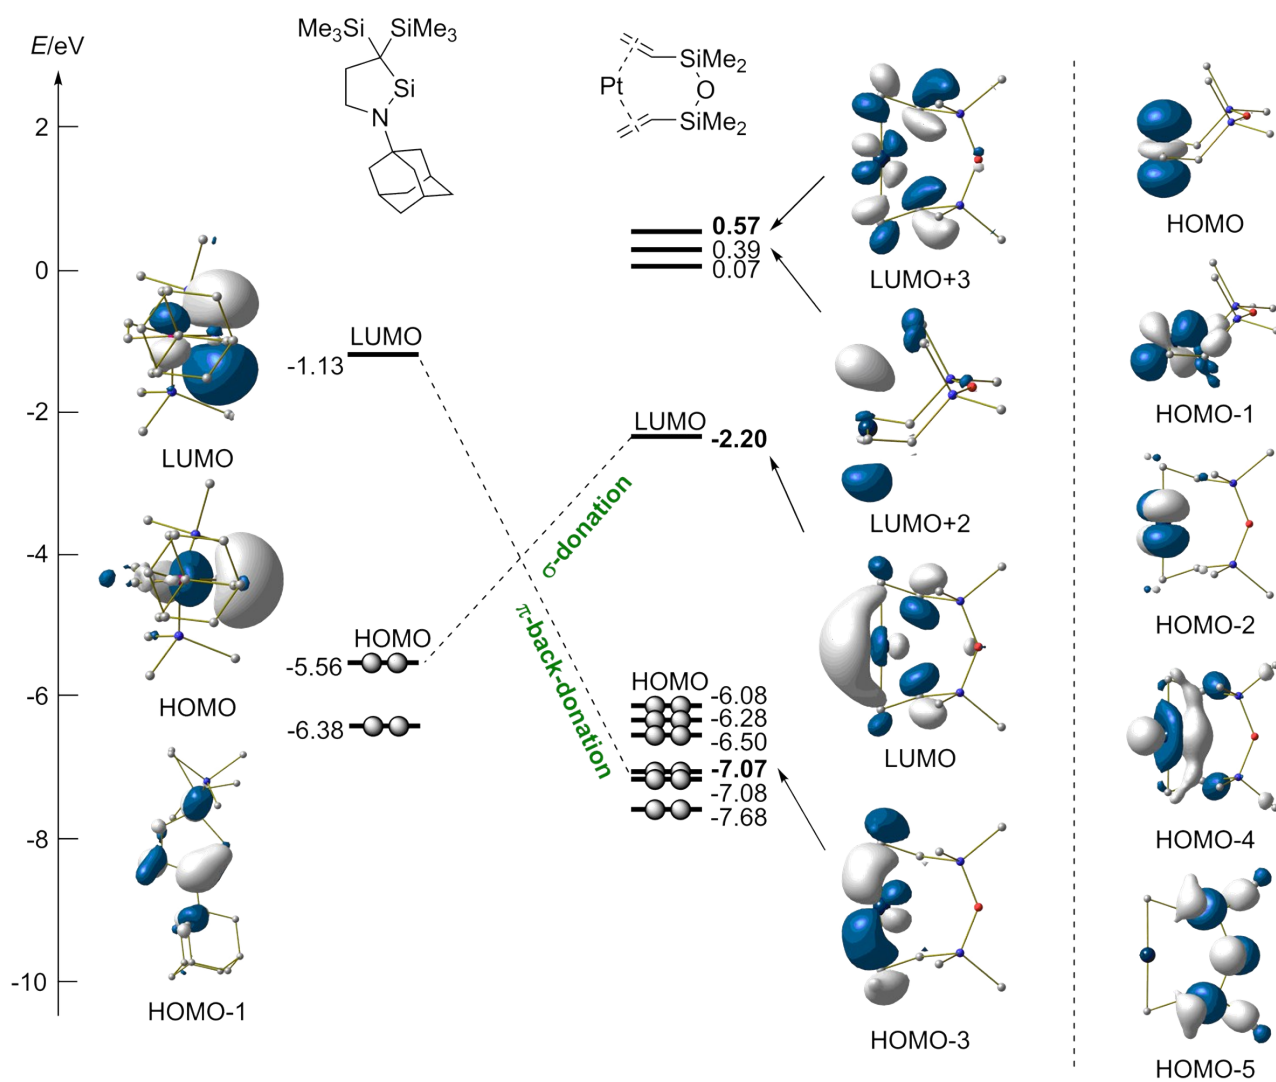

**Figure S33.** Important orbital interactions between cyclic (alkyl)(amino)silylene (left) and Pt(dvtms) (right) at the B3PW91-D3/B level of theory (Basis B: SDD for Pt atom and 6-311G(d) for H, C, N, O and Si atoms). Hydrogen atoms in the drawings are omitted for clarity.

## 5. References

S1. T. Kosai, S. Ishida and T. Iwamoto, *Angew. Chem. Int. Ed.*, 2016, **55**, 15554-15558.
